1 **Short Title:** Cotton fiber cells grow through a diffusive model

2

3 **Author for Correspondence:**

4 Prof. Yong-Ling Ruan

5 School of Environmental and Life Sciences, The University of Newcastle, Callaghan,

6 NSW, 2308, Australia

7 E-mail: [yong-ling.ruan@newcastle.edu.au](mailto:yong-ling.ruan@newcastle.edu.au)

8

9 Prof. Sergey Shabala

10 Tasmanian Institute of Agriculture, College of Science and Engineering, University of

11 Tasmania, Hobart, Tasmania 7001, Australia

12 International Research Centre for Environmental Membrane Biology, Foshan

13 University, Foshan 528000, China

14 E-mail: [sergey.shabala@utas.edu.au](mailto:sergey.shabala@utas.edu.au)>

15

16 **Research Area:** Cell Biology

17

---

18 **Zoom in on Ca<sup>2+</sup> pattern and ion flux dynamics to decode spatial and temporal**  
19 **regulation of cotton fiber growth**

20

21 Jia-Shuo Yang<sup>1,2#</sup>, Jayakumar Bose<sup>3#§</sup>, Sergey Shabala<sup>4,3\*</sup> and Yong-Ling Ruan<sup>1\*</sup>

22

23 <sup>1</sup>School of Environmental and Life Sciences, The University of Newcastle, Callaghan,  
24 NSW, 2308, Australia; <sup>2</sup>Department of Agronomy, College of Agriculture, Nanjing  
25 Agricultural University, Nanjing 210095, China; <sup>3</sup>Tasmanian Institute of Agriculture,  
26 College of Science and Engineering, University of Tasmania, Hobart, Tasmania 7001,  
27 Australia; <sup>4</sup>International Research Centre for Environmental Membrane Biology,  
28 Foshan University, Foshan 528000, China

29

30 #These authors contribute equally to the work

31 \*Correspondence to: Yong-Ling Ruan ([yong-ling.ruan@newcastle.edu.au](mailto:yong-ling.ruan@newcastle.edu.au)) or  
32 Sergey Shabala ([Sergey.Shabala@utas.edu.au](mailto:Sergey.Shabala@utas.edu.au))

33 §Current address: Australian Research Council Centre of Excellence in Plant Energy  
34 Biology, School of Agriculture, Food and Wine, University of Adelaide, Glen  
35 Osmond, SA 5064, Australia

36

37 **ORCID IDs:** 0000-0002-8394-4474 (Y.-L.R.); 0000-0003-2345-8981 (S.S.).

38

39 **One sentence summary**

40 Confocal imaging of Ca<sup>2+</sup> patterning and *in situ* microelectrode ion flux  
41 measurements demonstrate that, contrary to growing pollen tubes or root hairs, cotton  
42 fiber growth follows a diffusive, but not the tip growth, pattern.

43 **Footnotes**

44 **List of author contributions**

45 Y.-L.R. conceived the research; Y.-L.R. and S.S. supervised the research; J.-S.Y. and  
46 J.B. performed the experiments; All authors analysed the data; J.-S.Y., S.S. and  
47 Y.-L.R. wrote the article with inputs from J.B.

48

49 **Responsibilities of the Author for Contact**

50 The authors responsible for distribution of materials integral to the findings presented  
51 in this article in accordance with the Journal policy described in the Instructions for  
52 Authors (<http://www.plantphysiol.org>) are: Yong-Ling Ruan  
53 ([yong-ling.ruan@newcastle.edu.au](mailto:yong-ling.ruan@newcastle.edu.au)) or Sergey Shabala ([sergey.shabala@utas.edu.au](mailto:sergey.shabala@utas.edu.au)).

54

55 **Funding information**

56 This work was supported by Australian Research Council (DP180103834 to Y.-L.R.;  
57 DP170100430 to S.S.) and National Distinguished Expert Project of China  
58 (WQ20174400441 to S.S.).

59

60

61

62

63

64

65

66

67

---

68 **Abstract**

69 Cotton fibers are single-celled trichomes initiated from ovule epidermis prior to  
70 anthesis. Thereafter, the fibers undergo rapid elongation for 20 d before switching to  
71 intensive cell wall cellulose synthesis. The final length attained determines fiber yield  
72 and quality. As such, cotton fiber represents an excellent single cell model to study  
73 regulation of cell growth and differentiation, with significant agronomical  
74 implications. One major unresolved question is whether fiber elongation follows a  
75 diffusive or a tip growth pattern. We addressed this issue by using cell biology and  
76 electrophysiological approaches. Confocal imaging of  $\text{Ca}^{2+}$  binding dye,  
77 fluo-3 acetoxymethyl (Fluo-3), and *in situ* microelectrode ion flux measurement  
78 revealed that cytosolic  $\text{Ca}^{2+}$  was evenly distributed along the elongating fiber cells  
79 with  $\text{Ca}^{2+}$  and  $\text{H}^+$  fluxes oscillating from apical to basal regions of the elongating  
80 fibers. These findings demonstrate that, contrary to growing pollen tubes or root hairs,  
81 cotton fiber growth follows a diffusive, but not the tip growth, pattern. Further  
82 analyses showed that the elongating fibers exhibited substantial net  $\text{H}^+$  efflux,  
83 indicating a strong activity of the plasma membrane  $\text{H}^+$ -ATPase required for energy  
84 dependent solute uptake. Interestingly, the growing cotton fibers were responding to  
85  $\text{H}_2\text{O}_2$  treatment, known to promote fiber elongation, by a massive increase in the net  
86  $\text{Ca}^{2+}$  and  $\text{H}^+$  efflux in both tip and basal zones, while non-growing cells lacked this  
87 ability. These observations suggest that desensitization of the cell and a loss of its  
88 ability to respond to  $\text{H}_2\text{O}_2$  may be causally related to the termination of the cotton  
89 fiber elongation.

90

91

92

---

93 **Introduction**

94 Cotton (*Gossypium*) fibers are single-celled trichomes initiated from a quarter to one  
95 third of ovule epidermal cells about 16 to 24 h prior to anthesis (Ruan et al., 2000;  
96 Wang et al 2021). Following their protrusion from the ovule epidermis, the fiber cells  
97 undergo rapid cell elongation for about 20 d before switching to intensive secondary  
98 cell wall cellulose synthesis that lasts for 15 to 20 d (Ruan, 2005; Ruan, 2007). By  
99 maturity, the fiber cells can reach ~3 and ~5 cm long, in the cultivated species of *G.*  
100 *hirsutum* and *G. barbadense*, respectively, rendering cotton fiber one of the longest  
101 cells in the plant kingdom (Kim and Triplett, 2001; Ruan et al., 2001). As such, cotton  
102 fiber represents an attractive single-cell model to study cell expansion (Ruan et al.,  
103 2001; Ruan et al., 2004; Shan et al., 2014; Yu et al., 2019), cellulose synthesis (Amor  
104 et al., 1995; Ruan et al., 2003) and cell patterning (MacHado et al., 2009; Walford et  
105 al., 2011; Tian et al., 2020; Wang et al., 2020). Apart from its significance in studying  
106 fundamental plant biology, cotton fiber is the most important source of cellulose for  
107 the global textile industry. Therefore, advance in fiber biology will help to design  
108 innovative approaches to improve cotton yield and quality using advanced breeding or  
109 gene technology.

110 As outlined above, one extraordinary feature of the cotton fiber cells is its fast  
111 and sustained elongation at the average rate of 1500 to 2500  $\mu\text{m}$  per day for about 20  
112 d, with little or no increase in cell diameter that remains at around 10 to 15  $\mu\text{m}$  (Ruan,  
113 2007). Given this remarkable cellular characteristic and the fact that the fiber length is  
114 a key determinant of cotton yield and quality, there has been intensive research on the  
115 regulation of cotton fiber elongation over the last three decades. To this end, early  
116 studies established that the microtubules in elongating fiber cells are arranged  
117 transversely along the longitudinal axis (Seagull, 1990), which guided cellulose

---

118 deposition accordingly, thereby forcing fibers to elongate unidirectionally (Ruan,  
119 2007), a phenomenon confirmed recently using transgenic approach (Yu et al., 2019).  
120 On the other hand, cell biology and gene expression analyses revealed a temporary  
121 closure of plasmodesmata (PD), due to the deposition of callose at the fiber base,  
122 which coincided with the maximal expression of the plasma membrane sucrose  
123 transporter and expansin genes at the onset of rapid elongation from 10 d post anthesis,  
124 DPA (Ruan et al., 2001; Ruan et al., 2004). These findings underpin a model of the  
125 fiber elongation driven by the cell turgor and relaxed wall expansibility (Ruan, 2007).  
126 A follow-up study revealed that the fiber PD gating is under a tight control of the  
127 sterol-mediated callose degradation, and an increase in the duration of PD closure via  
128 silencing a sterol carrier gene activated the expression of genes encoding both  
129 H<sup>+</sup>-coupled sucrose transporters and -uncoupled clade III SWEETs (Zhang et al.,  
130 2017b). Recent molecular genetic studies and genome sequencing have identified a  
131 number of regulatory genes and networks underlying cotton fiber elongation (e.g.  
132 Shan et al., 2014; Hu et al., 2019).

133 Despite of the aforementioned progress, major questions remain regarding the  
134 spatial and temporal regulation of cotton fiber elongation. A key unresolved issue is  
135 whether the fiber cells elongate evenly along the the whole growth axis, or possess the  
136 tip-based growth pattern as that found in morphologically-similar structures such as  
137 root hairs or growing pollen tubes (Hepler et al., 2013; Mangano et al., 2018;  
138 Nakamura and Grebe, 2018). In other words, does cotton fiber elongation follow a  
139 diffusive pattern or a tip growth model? A related question is whether and how the  
140 growth pattern may change during elongation. In this context, cotton fiber cells are  
141 known lacking zonation of the endoplasmic reticulum, Golgi bodies and mitochondria  
142 or vesicles in the tip region (Tiwari and Wilkins, 1995) that are characteristic of the

---

143 tip-based growth (Yang, 1998). This is indicative of no polarized deposition of the  
144 new cell wall material for the apex expansion. By imaging fibers expressing  
145 fluorescent-tagged cytoskeleton proteins, Yu et al. (2019) observed that microtubules  
146 are organized transversely during fiber elongation, instead of being in bundles in  
147 parallel to the growth axis as typically observed in tip growth cells such as pollen  
148 tubes (Yang, 1998), a finding consistent with an early report (Seagull, 1992). These  
149 results support a diffusive growth model of the cotton fiber proposed previously  
150 (Ruan, 2007).

151       However, counter arguments against the diffusive growth model arise from  
152 several  $\text{Ca}^{2+}$  imaging studies, where elevated levels of  $\text{Ca}^{2+}$  were observed at the tip  
153 region of 2-5 DPA fibers (Huang et al., 2008; Zhang et al., 2017a), which is consistent  
154 with a tip growth pattern observed in elongating pollen tubes (Chen et al., 2009; Qu et  
155 al., 2012; Gu et al., 2015; Suwińska et al., 2017) and root hairs (Monshausen et al.,  
156 2008; Fan et al., 2011). A close examination of those reports, however, revealed that  
157 the fluorescent  $\text{Ca}^{2+}$  signal was observed in a much extensive region of the cotton  
158 fiber tips, often spanning 100 to 500  $\mu\text{m}$  from the edge of the tip (e.g. Huang et al.,  
159 2008), which does not match the geometric distribution of  $\text{Ca}^{2+}$  in either pollen tubes  
160 or root hairs that employ tip-based growth mechanism. Here, the hallmark of the tip  
161 growth is a localized elevation in the cytosolic free  $\text{Ca}^{2+}$  that is confined to only 5~ 25  
162  $\mu\text{m}$  region from the tip boundary (e.g. Fan et al., 2011; Gu et al., 2015; Gilroy et al.,  
163 2016). This, together with a lack of proper positive and negative controls and  
164 resolutions required to differentiate cytosol from other subcellular compartments such  
165 as vacuole in the previous reports on cotton fibers (Huang et al., 2008; Zhang et al.,  
166 2017a), raises a question of the validity of those findings on  $\text{Ca}^{2+}$  localization and the  
167 conclusions drawn (e.g. Qin and Zhu 2011). Also, reliance of fluorescence dyes alone

---

168 come with a caveat of the possible methodological issues of its loading in various  
169 types of cells and/or regions that could be related to the properties of the cell walls.  
170 This calls for a need to employ some other techniques to provide an unequivocal  
171 answer to the above question.

172       Physiologically, intracellular  $\text{Ca}^{2+}$  concentration is determined by  $\text{Ca}^{2+}$  influx  
173 and efflux across cellular membranes, with tip-based growing cells characterized with  
174 pronounced  $\text{Ca}^{2+}$  oscillation in the tip, but not in the shank region (Gilroy et al., 2016).  
175 Similar oscillatory patterns have been reported for pollen tubes (Holdaway-Clarke et  
176 al., 1998; Damineli et al., 2017) that also employ tip-based growth mechanism. There  
177 have been no studies thus far on the spatial behaviour of  $\text{Ca}^{2+}$  oscillation along the  
178 longitudinal axis of the growing cotton fibers.

179       To determine whether the cotton fiber cell follows a tip or diffusive growth  
180 pattern and to better understand the spatial and temporal regulation of fiber elongation,  
181 we have combined two advanced complementary techniques, namely fluorescent  
182 imaging using  $\text{Ca}^{2+}$  binding dye, fluo-3 acetoxymethyl (Fluo-3 thereafter) (Zhang et  
183 al., 1998; Zhang et al., 2015) and non-invasive ion-selective microelectrode technique,  
184 MIFE (Microelectrode Ion Flux Estimation, Shabala et al., 1997; Wu et al., 2020).  
185 Our analyses revealed that cytosolic  $\text{Ca}^{2+}$  was evenly distributed along the elongating  
186 fiber cells, with  $\text{Ca}^{2+}$  and  $\text{H}^+$  oscillations occurring in both apical and basal regions of  
187 the elongating fibers at 5 and 10 d post anthesis (DPA), a phenomenon absent in  
188 elongated fibers at 20 DPA. These findings demonstrate that cotton fiber growth  
189 clearly follows the diffusive but not tip-based growth pattern. Pharmacological  
190 experiments using various  $\text{Ca}^{2+}$  channel blockers on cultured cotton ovules indicate  
191 the involvement of both voltage-dependent and -independent  $\text{Ca}^{2+}$  channels in the  
192 cotton fiber elongation. Our analyses further uncovered several novel patterns



---

193 including findings that (i) the elongating, but not elongated, cotton fibers exhibited  
194 massive H<sup>+</sup> efflux with strongest observed at 10 DPA, the onset of rapid fiber  
195 elongation, indicating strong plasma membrane H<sup>+</sup>-ATPase activity; (ii) H<sub>2</sub>O<sub>2</sub>  
196 stimulated Ca<sup>2+</sup> and H<sup>+</sup> efflux from elongating, but not elongated, fibers and (iii) H<sub>2</sub>O<sub>2</sub>  
197 application promoted K<sup>+</sup> uptake into and efflux from growing and non-growing fibers,  
198 respectively. This data is discussed in the context of regulation of cell expansion by  
199 cellular energy status, ion homeostasis and H<sub>2</sub>O<sub>2</sub>-mediated signal transduction.

200

201

---

202 **Results**

203 **Validation on visualization of Ca<sup>2+</sup> in the cytosol of cotton fiber cells**

204 To visualize Ca<sup>2+</sup> signals in growing cotton fiber cells, cotton seeds with fibers  
205 attached were harvested on day of anthesis (0 DPA) and pre-loaded with ester form of  
206 Fluo-3 to produce the intracellular Ca<sup>2+</sup>-binding fluorescent probe, Fluo-3, following  
207 the cleavage of the ester group by the cytosolic esterase (Zhang et al., 1998; Zhang et  
208 al., 2015). A set of experiments was firstly conducted to ascertain that the Fluo-3  
209 fluorescent signals were emitted from the binding of cytosolic Ca<sup>2+</sup>, but not from that  
210 of other subcellular compartments.

211 Confocal imaging of the free-hand sections counterstained with Calcofluor  
212 White for cellulose revealed green fluorescent signals of the Ca<sup>2+</sup>-binding Fluo-3 in  
213 the region between cell walls and vacuoles (Fig. 1, A and B). Here, the Calcofluor  
214 White-labeled cell walls exhibited blue fluorescence only, whereas the vacuoles  
215 (asterisks in Fig. 1, A) showed no fluorescence, flanked by the Fluo-3 green  
216 fluorescence in the middle. The observation indicates that no Fluo-3 was produced in  
217 the cell wall and vacuolar compartments in our procedure, which could happen due to  
218 the presence of esterase in the extracellular matrix or leakage of tonoplasts (Zhang et  
219 al., 1998). To determine if the green fluorescence of Fluo-3 was sensitive to changes  
220 in Ca<sup>2+</sup> level, we cultured 0-d cotton seed for 5 d on the same but Ca<sup>2+</sup> free BT  
221 medium. This intervention abolished the green fluorescence, indicating no or little  
222 Ca<sup>2+</sup> left in the fiber cells following the Ca<sup>2+</sup> starvation treatment, although some  
223 residual signals remained visible in the underneath seed coat (Fig. 1, C). Elongating  
224 pollen tubes and root hairs are known to have high Ca<sup>2+</sup> level in the cytosol of their  
225 respective apical regions, thus representing ideal positive controls. Loading both cell  
226 systems with Fluo-3 resulted in a strong fluorescent signal in their tip regions (Fig. 1,

---

227 D and E), as expected (e.g. Fan et al., 2011; Suwińska et al., 2017).

228 To provide an unequivocal evidence that the fluorescence signal emitted from the  
229  $\text{Ca}^{2+}$ -binding Fluo-3 did come from the cytosol of the elongating fibers, plasmolysis  
230 was performed on cultured seed and fiber with 0.5 or 1.0 M sorbitol. In comparison  
231 with the non-plasmolysed control of 5-d cotton fibers, which exhibited a green  
232 fluorescence of Fluo-3 inside the cell wall but outside the vacuole (Fig. 2, A),  
233 plasmolysis induced by 0.5 M sorbitol caused the fiber protoplast being pulled away  
234 from the cell wall, leaving a gap between the cell wall displaying a blue fluorescence  
235 signal from Calcofluor White and the narrow strip exhibiting green fluorescence (Fig.  
236 2, B and C). A triple labelling with Fluo-3, Calcofluor White and RH-414, a plasma  
237 membrane-specific staining (Zhang et al., 2015) revealed that the Fluo-3 green  
238 fluorescence resided within the red fluorescence of RH-414 for plasma membrane  
239 (Fig. 2, C). In comparison to that treated with 0.5 M sorbitol (Fig. 2, B and C), the  
240 effect of plasmolysis became more evident following incubation with 1.0 M sorbitol,  
241 in which the region emitting  $\text{Ca}^{2+}$ -bound Fluo-3 green fluorescence was pulled further  
242 away from the cell wall with the vacuole becoming highly shrunken (Fig. 2, D) due to  
243 osmotically driven efflux of water (Ruan et al., 2000). These data established clearly  
244 that the  $\text{Ca}^{2+}$ -bound Fluo-3 green fluorescence was emitted from the cytosol of the  
245 elongating cotton fiber cells.

246

247 **Cotton fiber cells exhibited even distribution of the cytosolic  $\text{Ca}^{2+}$  from tip to**  
248 **base throughout the elongation period**

249 Having validated the procedure of using Fluo-3 to visualize cytosolic  $\text{Ca}^{2+}$  in fiber  
250 cells as illustrated above, we systemically imaged  $\text{Ca}^{2+}$  localization patterns in fibers  
251 across the entire elongation phase from 0 to 20 DPA as well as the peak stage of the

---

252 secondary cell wall cellulose synthesis at 30 DPA. Representative images from  
253 selected stages were shown in Figure 3.

254 The  $\text{Ca}^{2+}$  fluorescent signals were observed throughout the cytosols of almost all  
255 of the 0~2 d fiber initials (Fig. 3, A and insert). As the fiber cells elongate, the even  
256 distribution of cytosolic  $\text{Ca}^{2+}$  became more evident, reflected by the narrow strip of  
257 the fluorescent signals from tip to base with the non-fluorescent vacuole sitting in the  
258 centre (Fig. 3, B). Depending on the angle of the confocal imaging, some fiber cells  
259 exhibited tip-like fluorescent pattern at the first glance. However, a close examination  
260 revealed most of them displayed the fluorescence in the basal region as well (Class II  
261 in Fig. 3, B). Fiber cells with a true tip-localization of  $\text{Ca}^{2+}$  (Class I) was only  
262 sporadically observed. The uniform distribution of cytosolic  $\text{Ca}^{2+}$  pattern persisted to  
263 the end of elongation at 20 DPA. However, from 10 DPA onwards, an increased  
264 proportion of the fiber cells showed patchy fluorescence for  $\text{Ca}^{2+}$ , a phenomenon  
265 highlighted in 15 DPA fibers where boundaries between vacuole and cytosol became  
266 less defined and patchy signals (Class III) were seen across the whole protoplast area  
267 (Fig. 3, C). By 30 DPA, the fluorescence became very faint and patchy (Fig. 3, D).

268 The relative percentages of fibers exhibiting classes I, II and III  $\text{Ca}^{2+}$  patterns at  
269 each stage is shown in Figure 3 (E). As one can see, 0-d fiber initials were all in the  
270 class II category, exhibiting uniform  $\text{Ca}^{2+}$  signals throughout the cytosol. Tip-based  
271 location of the fluorescent  $\text{Ca}^{2+}$  signals was observed only in less than 5% of young  
272 fibers at 2-5 DPA and none in any other stages examined (Fig. 3, E). Interestingly,  
273 patchy pattern of  $\text{Ca}^{2+}$  signals (class III) increased from about 20% of 2-5 d fibers to ~  
274 48% at 10 DPA and then to ~ 80% at 15 to 20 DPA when elongation slows down and  
275 terminates (Ruan, 2007). By 30 DPA, all fibers displayed a patchy pattern of  $\text{Ca}^{2+}$ ,  
276 although the fluorescent signals became very weak at this stage (Fig. 3, D and E).

277

278 **Steady net Ca<sup>2+</sup> fluxes were similar between tip and basal regions of fiber cells**

279 Net Ca<sup>2+</sup> fluxes were measured from apical and basal parts of the cotton fiber cells  
280 (illustrated in Supplemental Figure 1) using MIFE technique. No significant (at  $P <$   
281 0.05) difference in the steady-state Ca<sup>2+</sup> flux was found between the two regions, with  
282 net Ca<sup>2+</sup> uptake of 25 to 40 nmol m<sup>-2</sup> s<sup>-1</sup> measured (Fig. 4, A). These steady-state Ca<sup>2+</sup>  
283 fluxes were largely independent of the cell age and not statistically different ( $P <$  0.05)  
284 between growing (5- and 10-d old) and non-growing (20 d old) fibers (Fig. 4, A). Also  
285 similar and not statistically different (except one value for 20 d old base) were steady  
286 net K<sup>+</sup> fluxes (Fig. 4, C). At the same time, net H<sup>+</sup> fluxes showed a clear  
287 age-dependent trend (Fig. 4, B), showing a maximal net H<sup>+</sup> efflux at 10 d. These  
288 results are consistent with the previous observations that 10 d is the turning point of  
289 switching from symplastic to apoplastic pathway when cells enter the rapid phase of  
290 elongation and probably possess strongest ATPase activity (Ruan et al., 2001). In  
291 non-growing 20-d fibers, this H<sup>+</sup> efflux is ceased, with net H<sup>+</sup> uptake detected (Fig. 4,  
292 B). At any age, the magnitude of net H<sup>+</sup> fluxes was higher in the tip compared with  
293 the base of the fiber (Fig. 4, B) suggesting higher metabolic activity in this region.

294 **Elongating fibers displayed ion flux oscillations in both tip and basal regions**

295 One of the hallmarks of growing pollen tubes and root hairs is a presence of clearly  
296 pronounced ultradian (a minutes' range of periods) oscillations that are observed in  
297 the cell tip but absent in the basal region (Monshausen et al., 2008; Zhou et al., 2014;  
298 Mangano et al., 2018; Hoffmann et al., 2020). Here, net Ca<sup>2+</sup> ion flux oscillations  
299 were observed in both tip and base regions of the 10-d cotton fiber (Fig. 4, D), further  
300 supporting the concept of the diffusive fiber growth. The frequency of these  
301 oscillations were similar to those reported in the literature for root hairs and pollen

---

302 tubes and ranged between 2 and 8 min in period. These oscillations were absent in  
303 non-growing (20 d old) fibers (as illustrated in Fig. 4, E for  $H^+$  flux data). Given a  
304 well-established role of  $Ca^{2+}$  oscillations in a broad range of plant developmental and  
305 adaptive responses (Tian et al., 2020), it is, therefore, plausible to suggest that the  
306 difference between growing and non-growing fiber cells may be potentially related to  
307 their ability to encode some vital information by means of  $Ca^{2+}$  flux oscillations.

308

309  **$H_2O_2$  stimulate  $Ca^{2+}$  and  $H^+$  efflux from elongating but not elongated fiber cells**

310 Previous studies on both root hairs (Foreman et al., 2003) and pollen tubes (Lee and  
311 Yang, 2008) have revealed an important role of  $H_2O_2$  as a component of the cell  
312 growth mechanism.  $H_2O_2$  was also shown to be involved in cotton fiber growth (Tang  
313 et al., 2014). Maintaining cytosolic ROS homeostasis has been implicated in  
314 regulating cotton fiber elongation, with low  $H_2O_2$  levels likely promoting elongation  
315 (Li et al., 2007). To check how ROS may impact on ion flux dynamics, we studied net  
316 ion flux responses to physiologically relevant concentration of  $H_2O_2$  in two zones of  
317 growing (10 d) and 20-d non-growing fiber cells (Fig. 5).

318 In the growing fibers,  $H_2O_2$  treatment stimulated massive net efflux of  $Ca^{2+}$  (Fig.  
319 5, A) and  $H^+$  (Fig. 5, B), indicative of stimulation of respected ion pumps and resulted  
320 in a significant shift towards net  $K^+$  uptake (less efflux; Fig. 5, C) that could be  
321 essential for both turgor-driven growth and a charge balance. No significant effects of  
322  $H_2O_2$  on  $Ca^{2+}$  and  $H^+$  fluxes were observed in the non-growing cells, and  $H_2O_2$   
323 treatment here resulted in increased net  $K^+$  efflux from the cell. Thus, it appears that  
324 desensitization of the cell and a loss of its ability to respond to  $H_2O_2$  may be causally  
325 related to the fiber growth mechanism. The magnitude of  $H_2O_2$  -induced  $Ca^{2+}$  flux  
326 response was ~2 fold higher in the fiber tip than that in the base (Fig. 5, A and D) in

---

327 growing cells. Similar patterns were also observed in the magnitude of H<sub>2</sub>O<sub>2</sub> -induced  
328 changes in net H<sup>+</sup> flux (Fig. 5, B and E). Here, growing cells showed intrinsically  
329 more negative H<sup>+</sup> flux values (net H<sup>+</sup> efflux) compared with non-growing cells (net  
330 H<sup>+</sup> uptake). Application of H<sub>2</sub>O<sub>2</sub> has further increased net H<sup>+</sup> efflux in growing cells,  
331 with much stronger effects reported for the tip (Fig. 5). These findings are consistent  
332 with the above observations of higher H<sup>+</sup>-ATPase pumping activity in the tip region,  
333 once again pointing at likely higher metabolic activity in this zone. Net K<sup>+</sup> responses  
334 to H<sub>2</sub>O<sub>2</sub> in the base were qualitatively similar to those in the tip, although several fold  
335 lower in magnitude (Fig. 5, C and F).

336

### 337 **Cotton fiber elongation is dependent on Ca<sup>2+</sup> channel activities**

338 Ca<sup>2+</sup> flux and its cytosolic homeostasis are largely dependent on the orchestrated  
339 activities of numerous plasma membrane Ca<sup>2+</sup> channels and efflux systems  
340 (Ca<sup>2+</sup>\_ATases and CAX Ca<sup>2+</sup>/H<sup>+</sup> exchangers; Bose et al., 2011; Demidchik et al.,  
341 2018). To assess a possible role of these transporters in cotton fiber elongation, cotton  
342 seeds at 0 or 6 DPA were transferred into the BT medium containing one of the  
343 following three blockers-ruthenium red (RR; a known blocker of the tonoplast  
344 Ca<sup>2+</sup>-permeable slow vacuolar channels; Pottosin et al., 1999), verapamil (VP; a  
345 blocker of the plasma membrane-based voltage-dependent Ca<sup>2+</sup> channel; De Vriese et  
346 al., 2018) and gadolinium (Gd<sup>3+</sup>; a blocker of non-selective cation permeable NSCC  
347 channels; Demidchik and Maathuis, 2007; Zepeda-Jazo et al., 2011). The first batch of  
348 seeds were cultured from 0 to 6 DPA to examine the impact of the blockers on early  
349 fiber elongation. As shown in Figure 6 (A), application of RR and VP reduced fiber  
350 elongation by about 20% in comparison with the control with no effect on seed fresh  
351 weight, whereas inclusion of Gd<sup>3+</sup> blocked fiber growth completely and severely

---

352 inhibited seed growth (Supplemental Figure 1). We further tested the effect of these  
353  $\text{Ca}^{2+}$  channel blockers on mid stage fiber elongation, namely from 6 DPA onwards. To  
354 this end, application RR, VP and  $\text{Gd}^{3+}$  reduced fiber elongation by about 40%, 75%  
355 and 60%, respectively with moderate inhibitory effect on seed weight by RR or VP,  
356 but not by  $\text{Gd}^{3+}$  treatment (Fig. 6, B; Supplemental Figure 1). These findings indicate  
357 the essential roles of  $\text{Ca}^{2+}$  channels in the cotton fiber elongation.

358

359



---

360 **Discussion**

361 Plant cells grow diffusively across the whole cell surface (Geitmann and Ortega, 2009;  
362 Tian et al., 2015) or specifically at the tip area only (Rounds and Bezanilla, 2013; De  
363 Jong et al., 2019). The former is characterized with incorporation of a new wall  
364 material uniformly distributed across the cell surface leading to even growth over the  
365 cell axis as observed in most cell types including, for example, leaf mesophyll cells,  
366 epidermal trichomes and pavement cells (Smith and Oppenheimer, 2005; Yanagisawa  
367 et al., 2015). Some plant cells concentrate their wall extension through incorporating  
368 new wall material only to the apical site, hence becoming tip-growth such as that in  
369 the pollen tubes (Qu et al., 2012; Gu et al., 2015) and root hairs (Monshausen et al.,  
370 2008; Fan et al., 2011). As outlined in the Introduction, it remains unresolved as  
371 whether cotton fiber cells, the most important cell types producing cellulose for the  
372 gloable textile industry, follow a tip- or diffusive-based growth pattern. Here, we  
373 provided compelling cell biology and eletrophysiology evidence that elongating  
374 cotton fiber employs a diffusive but not tip growth mechanism as schematically  
375 illustrated (Fig 7).

376

377 **Cotton fibers follow a diffusive growth as evidenced by a uniform distribtion of**  
378 **the intracellular free cytosolic Ca<sup>2+</sup> and similar Ca<sup>2+</sup> flux patterns in both tip and**  
379 **basal zones**

380 By confocal imaging of the Ca<sup>2+</sup>-bindig fluorescent dye, Fluo-3, we showed that Ca<sup>2+</sup>  
381 was uniformely distributed in the cytosol of the fiber cells throughout its elongation  
382 period from 0 to 20 DPA (Figs. 1 to 3). Occusionally, less than 5% of young fiber  
383 cells appeared to show tip-localized Ca<sup>2+</sup> at 2-5 DPA, which probably was an artifact  
384 derived from the the cytosolic Ca<sup>2+</sup> being pushed to the tip area during sectioning and

---

385 imaging process. It is interesting to note from 10 DPA onwards, an increased  
386 proportion of the fiber cells exhibited patchy fluorescence of Ca<sup>2+</sup>-binding Fluo-3,  
387 which reached ~ 80% by 15 to 20 DPA (Fig. 3, E), when fiber cells enter the transition  
388 from elongation to cell wall cellulose synthesis (Ruan, 2007). The fluorescence of  
389 Fluo-3 is dependent on esterase activity which catalyzes the removal of the ester  
390 group of the non-fluorescent dye Fluo-3 ester once it has diffused from the cell wall  
391 matrix to the cytoplasm, thereby allowing Fluo-3 to bind Ca<sup>2+</sup> leading to emission  
392 of fluorescence (Zhang et al., 1998). Previous studies indicate that as cotton fiber cells  
393 approach to the end of the elongation at ~ 15 DPA, the tonoplasts become increasingly  
394 leaky, which may generate highly localized pH change and even release additional  
395 esterase from the vacuole (Ruan et al., 2001; Ruan et al., 2004), resulting in  
396 concentrated Fluo-3 in those areas, hence patchy fluorescence (Fig. 3).

397 In contrast to tip-based growing cells where Ca<sup>2+</sup> oscillations are restricted to the  
398 apical region, the growing cotton fiber cells displayed Ca<sup>2+</sup> and H<sup>+</sup> oscillation in both  
399 tip and basal regions at 5 and 10 DPA but not at 20 DPA when elongation has  
400 completed (Fig. 4, Fig. 7). Ion flux oscillations are firmly associated with a broad  
401 range of developmental and adaptive processes, and rapid (ultradian) oscillations are  
402 considered as a hallmark of each elongating cells. Indeed, a strong association was  
403 found between oscillations in H<sup>+</sup> and Ca<sup>2+</sup> fluxes into epidermal cells and root growth  
404 rate (Shabala et al., 1997; Shabala and Newman, 1997), with no oscillations found in  
405 roots growing slower than 2 μm min<sup>-1</sup>. These oscillations were always observed in the  
406 elongation and meristematic regions of plant roots, but only occasionally in the  
407 mature root zone (Shabala and Knowles, 2002). The same is true for the polarized cell  
408 growth of pollen tube and root hair in which tip-focused Ca<sup>2+</sup> oscillations specify the  
409 signalling events for rapid cell elongation (Tian et al., 2020).

---

410 A critical component of ion flux oscillations are H<sup>+</sup>-ATPase pumps that energize  
411 membranes and form a feedback loop(s) with various voltage-dependent cation and  
412 anion channels (Hansen, 1978; Gradmann, 2001; Shabala et al., 2006). By controlling  
413 voltage-gated Ca<sup>2+</sup> channels (Demidchik et al., 2018), such oscillations in the  
414 H<sup>+</sup>-pump activity may rapidly modulate cytosolic free Ca<sup>2+</sup> concentrations in the cell  
415 creating specific Ca<sup>2+</sup> “signatures” and activating an array of signalling pathways  
416 (Tian et al., 2020). Here we showed that, contrary to reports for pollen tubes or root  
417 hairs, such Ca<sup>2+</sup> and H<sup>+</sup> flux oscillations were observed in both tip and basal regions  
418 of the growing cotton fiber cell (Fig. 4, D) but only in growing cells (Fig. 4, E). The  
419 disturbance to cell’s ability to transport Ca<sup>2+</sup> across the plasma membrane (by  
420 pharmacological agents) resulted in a significant (up to 70%) reduction in the fiber  
421 growth (Fig. 6). Taken together, this data indicates that elongating cotton fiber  
422 employs a diffusive, but not tip growth, mechanism that is strongly dependent on  
423 external Ca<sup>2+</sup> transport from the apoplast across the plasma membrane. It also appears  
424 that oscillations in the fibre tip are faster than in the base, suggesting a possibility of  
425 the frequency encoding of growth-related signals. The details of this process warrants  
426 a separate investigation.

427

#### 428 **Growing and non-growing cotton fibers exhibit different flux dynamics of Ca<sup>2+</sup>** 429 **H<sup>+</sup> and K<sup>+</sup> and their response to H<sub>2</sub>O<sub>2</sub>**

430 H<sub>2</sub>O<sub>2</sub> has been shown to function as a signalling molecule to promote cotton fiber  
431 elongation, likely through enhancing the activity of Ca<sup>2+</sup>-binding protein, Calmodulin  
432 (Tang et al., 2014). H<sub>2</sub>O<sub>2</sub> is also known as a potent activator of several types of  
433 Ca<sup>2+</sup>-permeable ion channels, forming so called ‘Ca<sup>2+</sup>-ROS hub’ and amplifying  
434 cytosolic Ca<sup>2+</sup> signals (Demidchik et al., 2018) in root epidermis and leaf mesophyll

435 cells. Here, however, application of H<sub>2</sub>O<sub>2</sub> resulted in a massive net Ca<sup>2+</sup> efflux (Fig. 5,  
436 A and D) that was observed in both apical and basal region but only in growing fibers.  
437 As electrochemical [Ca<sup>2+</sup>] gradient across the plasma membrane favours  
438 thermodynamically passive Ca<sup>2+</sup> uptake, the observed net Ca<sup>2+</sup> efflux can be only a  
439 result of operation of some active Ca<sup>2+</sup> transport system (such as Ca<sup>2+</sup>-ATPase or  
440 Ca<sup>2+</sup>/H<sup>+</sup> exchanger) activated by H<sub>2</sub>O<sub>2</sub>. Zepeda-Jaso et al. (2011) reported that  
441 hydroxyl radicals (another type of ROS) caused activation of eosin yellow-sensitive (a  
442 specific Ca<sup>2+</sup> pump inhibitor) Ca<sup>2+</sup> efflux from pea root epidermis, and that these  
443 effects were potentiated by polyamines (Velarde-Buendía et al., 2012). Thus, we  
444 speculate that a similar scenario may be applicable here.

445       The physiological rationale behind activation of Ca<sup>2+</sup> efflux remains a subject of  
446 a separate study. ACA-type (plasma membrane-based) Ca<sup>2+</sup>-ATPases are essential  
447 component of the polarized cell growth. Four ACAs (ACA2, 7, 9, 11) are highly  
448 expressed during most of the pollen developmental stages (García Bossi et al., 2020),  
449 and insertional mutants of ACA9 show reduced pollen tube growth (Schjøtt et al.,  
450 2004). Ca<sup>2+</sup>-ATPases are also essential for a root hair growth. In our case, net Ca<sup>2+</sup>  
451 efflux was activated by ROS treatment (Fig. 5). The most likely explanation on the  
452 stimulation of Ca<sup>2+</sup> efflux by H<sub>2</sub>O<sub>2</sub> is that such stimulation of Ca<sup>2+</sup> ATPase is required  
453 to return cytosolic [Ca<sup>2+</sup>] levels down to the basal levels, once the ROS signalling is  
454 over (Bose et al., 2011). Indeed, the above “Ca<sup>2+</sup>-ROS hub”, that is formed by the  
455 H<sub>2</sub>O<sub>2</sub>-inducible Ca<sup>2+</sup> permeable non-selective cation channel and NADPH oxidase  
456 (Demidchik et al., 2018), operates in a positive feedback manner and can result in an  
457 uncontrollable increase in ROS accumulation in the growing cell, with a danger of a  
458 possible damage to key macromolecules and cellular structures. Hence, once the ROS  
459 signalling is over, operation of this self-amplifying system should be ceased. The

---

460 H<sub>2</sub>O<sub>2</sub>-induced activation of Ca<sup>2+</sup>-ATPase may serve just this purpose.

461 The elongating (5 and 10 DPA), but not elongated (20 DPA), cotton fibers  
462 exhibited net H<sup>+</sup> efflux, with the strongest efflux observed at 10 DPA (Fig. 4). This  
463 efflux was vanadate-sensitive (data not shown), implying involvement of H<sup>+</sup>-ATPase.  
464 The magnitude of H<sup>+</sup> efflux was further stimulated by H<sub>2</sub>O<sub>2</sub> treatment (Fig. 5)  
465 implying activation of H<sup>+</sup>-ATPase (in addition to that of Ca<sup>2+</sup> ATPase). This  
466 activation would hyperpolarize the plasma membrane and positively impact on  
467 acquisition and transport of essential nutrients and metabolites (Ruan, 2007).

468 Cotton fiber growth relies on the import of nutrient resources from the basal ends  
469 connecting the underlying seed coat. During fiber elongation, the cellular pathway for  
470 nutrient import switches from symplasmic pathway via plasmodesmata early in  
471 elongation to apoplasmic route at ~10 DPA at the onset of rapid fiber elongation  
472 (Ruan et al., 2001; Ruan et al., 2004). This switch coincides with strong expression of  
473 a group of plasma membrane sugar and K<sup>+</sup> transporters to uptake sugars and K<sup>+</sup>,  
474 major osmotical solutes in the fiber cells (Ruan et al., 2001; Zhang et al., 2017b).  
475 Here, we show that H<sub>2</sub>O<sub>2</sub> treatment resulted in a shift towards net K<sup>+</sup> uptake in a  
476 growing cotton fiber (Fig. 5, C and F) that could be explained by both H<sup>+</sup>-ATPase  
477 pump-mediated membrane hyperpolarization (hence, opening inward-rectifying K<sup>+</sup>  
478 channels) and increased pH gradient across the plasma membrane to provide a driving  
479 force for operation of the high affinity K<sup>+</sup> uptake systems (e.g. K<sup>+</sup>/H<sup>+</sup> exchangers;  
480 Rubio et al. 2020). The highest H<sup>+</sup>-ATPase activity and its increased sensitivity to  
481 H<sub>2</sub>O<sub>2</sub> at 10 DPA may be also essential to transport sucrose (via H<sup>+</sup>/sucrose symporter  
482 (Ruan et al., 2001; Zhang et al., 2017b). Together with K<sup>+</sup>, sucrose import may also  
483 osmotically drive fiber elongation as K<sup>+</sup> and malate account for ~ 50% of the total  
484 osmolality with soluble sugars making up the remaining 50% and they collectively

---

485 play essential role in generating osmotic potential, hence turgor (Dhindsa et al., 1975;  
486 Ruan et al., 2001; Wang et al., 2010). In this context, activation of H<sup>+</sup>-ATPase by ROS  
487 could be a critical step in generating cell turgor for fiber elongation.

488

## 489 **Materials and Methods**

### 490 **Plant Material**

491 Cotton (*Gossypium hirsutum* cv. Coker 315 plants were grown under controlled  
492 conditions as previously described (Ruan et al., 1997). Cotton seeds were sown in a  
493 potting mixture (Metro-Mix 200 growing medium, Scotts, Columbus, OH). The plants  
494 were raised under greenhouse conditions with partial temperature control (25-30 °C  
495 during the day for 14 h and 18-22 °C during the night for 10 h. About 100 g per pot of  
496 Osmocote (Scotts), a controlled release fertilizer with N:P:K at 1:1:1, was applied  
497 once every 20 d. The plants were watered once every 2 d. Cotton bolls were sampled  
498 at 9:00~ 10 am on d of anthesis for ovule culture.

499

### 500 **Cotton Ovule Culture**

501 The procedure of cotton ovule culture was carried out as described (Li et al., 2010)  
502 with some modifications. Cotton bolls (0 DPA) at 1<sup>st</sup> nodes of middle fruiting  
503 branches were collected and surface-sterilized with 70 % (v/v) ethanol for 30-60 s and  
504 a quick exposure to methane burner flame, followed with treatment of 6% (v/v)  
505 sodium hypochlorite (NaOCl) for 20 min. Thereafter, the bolls were washed with  
506 sterile water to remove residual NaOCl. Ovules were removed aseptically from  
507 middle part of each locule and floated on 50 ml liquid BT medium (Beasley and Ting,  
508 1974) in a 300 ml- plastic culture bottle with 20 ovules per flask. The bottles were  
509 placed in the dark at 30 °C without shaking until observations.

---

510 The BT culture medium was prepared according to (Beasley and Ting, 1974).  
511 indole-3-acetic acid (IAA) sodium salt and gibberellic acid (GA<sub>3</sub>) potassium salt were  
512 dissolved in water and filter sterilized to obtain stock solutions of 50 mM and 5 mM,  
513 respectively. In practice, 5 μM IAA and 0.5 μM GA<sub>3</sub> were added to the BT medium  
514 after autoclaving. All above operations were performed under sterile condition.

515

### 516 **Confocal imaging of Ca<sup>2+</sup> patterning**

517 Cotton ovules with fibers attached were pre-loaded with the intracellular Ca<sup>2+</sup>  
518 sensitive fluorescent probe, fluo-3 acetoxymethyl (Fluo-3 thereafter) ester (Biotium,  
519 US) following a protocol adapted from (Zhang et al., 1998). For loading, cotton  
520 ovules were incubated in the BT medium contains 20 μM Fluo-3 ester (stock in  
521 DMSO), 200 μM CaCl<sub>2</sub>, and 50 mM sorbitol in a 12-well cell culture plate (2 ml per  
522 well) for 3 h at 4 °C in the dark to minimize the hydrolysis of AM ester by potential  
523 extracellular esterases. Cotton ovules were then transferred to a new BT medium  
524 incubated for 2 h at 26 °C to allow the cleavage of the loaded Fluo-3 ester to Fluo-3  
525 by cytosolic esterases, thereby trapping the impermeable Fluo-3 in the cytosol of fiber  
526 cells. Afterwards, hand-cut sections of cotton ovule with fiber attached were washed 3  
527 times by phosphate-buffered saline (PBS) plus 100 mM sucrose. In specified  
528 instances, sections were counterstained with 0.1 % (w/v) Calcofluor White for 30 s to  
529 label the cell wall and the (Zhang et al., 2015). Thereafter, sections were transferred to  
530 1 ml of PBS containing 100 mM sucrose for preparation of confocal imaging.  
531 Sections of cotton ovules were carefully placed on slides to ensure most fiber cells  
532 were placed on the same focal plane.

533 Fluorescent imaging of cotton ovule and fiber cells was performed using an  
534 Olympus FV1000 confocal laser scanning microscopy (Olympus, Japan). Fluo-3 was

---

535 excited with a 488 nm diode laser (15 mW, laser power set to 50 %) and emitted  
536 fluorescence captured at 515 nm, while Calcofluor White was excited with a 405 nm  
537 UV laser (50 mW, laser power set to 15 %) and emitted fluorescence captured at 460  
538 nm. Gain of the photomultiplier tube was set to 600 V for Fluo-3, and 400 V for  
539 Calcofluor White.

540 To imaging Fluo-3 fluorescence in cotton root hairs, 14 d old seedlings were  
541 chosen for root sampling, and loading of Fluo-3 as that for cotton ovules. For  
542 imaging of Fluo-3 in pollen tubes, pollen grains were harvested from blooming  
543 flowers and suspended in the culture medium (1.0 mM KCl, 0.06 mM CaCl<sub>2</sub>, 1.0 mM  
544 H<sub>3</sub>BO<sub>3</sub>, and 1.0 mM MES, pH 6.0 (Tris)) at room temperature (26 °C) for 30 min.  
545 Then Fluo-3 ester (20 μM final concentration) was added to the culture medium and  
546 incubated for 2 h at 4 °C in darkness. Pollen grains were then washed three times with  
547 dye-free culture medium and then incubated for 2 h at 26 °C before fluorescent  
548 imaging.

549

#### 550 **Plasmolysis of fiber cell**

551 To better identify the subcellular localization of the Ca<sup>2+</sup> signal, Fluo-3 loaded cotton  
552 ovules (5 DPA) were counterstained with 10 μM RH-414, a cell membrane tracker  
553 (Molecular Probes, US), during the last 30 min of cleaving Fluo-3 ester, before  
554 hand-cutting. Thereafter, sections of cotton ovule were soaked in the PBS solution  
555 containing 500 mM or 1 M sorbitol for 20 min to achieve moderate or severe  
556 plasmolysis of the fiber cells, respectively. RH-414 was excited with a 559nm diode  
557 laser (15 mW, laser power set to 25%) and emitted fluorescence captured at 625 nm.  
558 Gain of the photomultiplier tube was set to 500 V.

559



---

560 **Non-invasive H<sup>+</sup>, Ca<sup>2+</sup> and K<sup>+</sup> flux measurements using MIFE<sup>TM</sup> technique**

561 The H<sup>+</sup>, Ca<sup>2+</sup> and K<sup>+</sup>-selective microelectrodes were prepared and calibrated as  
562 described elsewhere (Shabala et al., 2013). A lock from the bolls of 5 DPA or 10 DPA  
563 or 20 DPA was gently removed and secured on a glass slide using a thin paraffin strip  
564 and conditioned in basal salt medium (BSM; 120 mM Glucose, 1 mM KCl, 0.1 mM  
565 CaCl<sub>2</sub> pH 5.7 ± 0.2) for 40 minutes at room temperature for recovery of growth  
566 (Supplemental Figure S1). The net H<sup>+</sup>, Ca<sup>2+</sup> and K<sup>+</sup> fluxes were measured from apical  
567 and basal regions of the cotton fiber at 40 μm away from individual fiber cells using  
568 MIFE technique for up to 60 min. To study the H<sub>2</sub>O<sub>2</sub>-induced flux changes,  
569 steady-state ion fluxes were measured for 10 minutes at respective regions of the  
570 cotton fiber. Thereafter, 5 mM H<sub>2</sub>O<sub>2</sub> was added to the BSM, and transient ion fluxes  
571 were monitored for further 30-40 min.

572

573 **Pharmacological experiments**

574 To examine the role of Ca<sup>2+</sup> channels in cotton fiber growth, the pharmacological  
575 approach was undertaken. Ruthenium red (RR; known blocker of the tonoplast  
576 Ca<sup>2+</sup>-permeable slow vacuolar channels), verapamil (VP; a blocker of the plasma  
577 membrane-based voltage-dependent Ca<sup>2+</sup> channel) and gadolinium (Gd<sup>3+</sup>; a blocker of  
578 non-selective cation permeable NSCC channels) were added to the culture medium  
579 individually at specified DPA. RR and Gd<sup>3+</sup> were added from aqueous stocks of 5 mM  
580 and 50 mM, respectively; VP was added from a 100 mM stock in ethanol. The  
581 pharmaceuticals were diluted prior to use to working concentrations of 50 μM, 0.2  
582 mM, and 1 mM for RR, VP, and Gd<sup>3+</sup>, respectively.

583

584 **Measurement of the fiber length**

---

585 Cotton ovules with fibers attached were boiled in 100 ml of distilled water with 2-3  
586 drops of 1 M HCl inside for 1 min. Afterwards, each ovule was carefully placed on a  
587 convex dish, and fibers grown on the ovule were streamed out with a jet of water.  
588 Then, fiber length was determined from the attachment point of fiber and ovule to the  
589 edge where most fibers terminate at. A vernier caliper together with a dissecting  
590 microscope were employed for the measurement.

591

### 592 **Data analysis**

593 Fluorescent images captured by confocal microscope were edited in software  
594 FV10-ASW 4.0 viewer. Schematic diagram was drawn by software PowerPoint 2013  
595 (Microsoft). Graphs were plotted by Excel 2013 (Microsoft). Student's T test and  
596 ANOVA analyses were performed in SPSS 20 (IBM).

597

### 598 **ACKNOWLEDGMENTS**

599 J-S Y gratefully acknowledges support from China Scholarship Council. We thank Dr  
600 Huiming Zhang for advice on confocal imaging of Ca<sup>2+</sup> patterning.

601

602

603

604

605

606

607

608

609

610

611

612

613

614

615

616

617

618

619

620

621 **Figure legends**

622 **Figure 1.** Validation of Ca<sup>2+</sup> indicator Fluo-3 in cotton fibers, pollen tubes and root  
623 hairs.

624 Green fluorescence came from the membrane-impermeable intracellular Ca<sup>2+</sup>  
625 indicator Fluo-3, whereas blue fluorescence reflected the cell wall indicator  
626 Calcofluor White (CW) binding to cellulose. Cotton seeds (5 days post anthesis, DPA)  
627 with fibers attached were co-stained with Fluo-3 and CW (A), or with CW only (B).  
628 (C) Cotton fibers derived from seeds cultured in a Ca<sup>2+</sup>-free BT medium were  
629 co-stained with Fluo-3 and CW at 5 DPA. Note, the presence of Ca<sup>2+</sup> fluorescence  
630 signals (arrowheads) in (A) outside the vacuoles (asterisks) but its absence in the  
631 negative controls of (B) and (C). (D and E) Representative images of cotton pollen  
632 tube and cotton root hair, respectively, stained with Fluo-3, showing Ca<sup>2+</sup> fluorescence  
633 at the tip regions. Scale bars in (A, B and C) = 100 μm, in (D and E) = 50 μm.

634

---

635 **Figure 2.** Localization of  $\text{Ca}^{2+}$  in the cytosol of elongating fiber cells.  $\text{Ca}^{2+}$  was  
636 indicated by green fluorescence emitted from Fluo-3.

637 Cell wall and plasma membrane were labelled with Calcofluor White (CW, blue  
638 fluorescence) and with RH-414 (red fluorescence), respectively. 5 d cotton seeds with  
639 fibers attached were incubated for 30 min in PBS medium (A), or the PBS with  
640 sorbitol at 0.5 M (B and C) or 1 M (D) before confocal imaging. Note, in comparison  
641 with the control (non-plasmolysed in (A)), plasmolysis resulted in protoplast being  
642 pulled away from the cell wall (B, C), a phenomenon becoming more evident under  
643 1.0 M sorbitol treatment (D). In all cases,  $\text{Ca}^{2+}$  was localized in the cytosol between  
644 the cell wall and vacuole. Scale bars = 15  $\mu\text{m}$ .

645 **Figure 3.** Dynamics of  $\text{Ca}^{2+}$  patterning in cotton fibers from elongation to rapid cell  
646 wall cellulose synthesis.

647  $\text{Ca}^{2+}$  was indicated by green fluorescence emitted from Fluo-3 labelling. (A) Young  
648 fiber cells elongated from seed epidermis (arrows) at 2 DPA, showing  $\text{Ca}^{2+}$  signals in  
649 the cytosol (insert). (B) Elongating fiber cells at 5 DPA, exhibiting  $\text{Ca}^{2+}$  signals  
650 occasionally concentrated to the tip area but mostly in the peripheral regions of the  
651 fibers, termed as pattern class I and II, respectively. Asterisks in (A and B) indicate  
652 vacuoles. (C) Cotton fibers at 15 DPA, a transition phase from elongation to  
653 secondary cell wall cellulose synthesis. The fluorescent  $\text{Ca}^{2+}$  signals became  
654 aggregated or patchy, categorized as pattern class III. (D) Cotton fibers at 30 DPA,  
655 undergoing intensive cellulose synthesis, displayed much reduced  $\text{Ca}^{2+}$  signals, in  
656 comparison with that in the early stages (A, B, and C). Scale bars = 100  $\mu\text{m}$ . I The  
657 relative percentages of classes I, II and III  $\text{Ca}^{2+}$  patterns across fiber development,  
658 which were calculated by counting at least 30 individual fiber cells randomly selected  
659 from 10 seeds at each stage.

660

661 **Figure 4.** Net ion flux profiles across the plasma membrane of the cotton fiber cells

662 measured by the non-invasive microelectrode MIFE technique.

663 Panel A to C show mean values of steady-state net  $\text{Ca}^{2+}$  (A),  $\text{H}^+$  (B), and  $\text{K}^+$  (C) fluxes

664 measured from the tip and basal regions of growing (5 and 10 DPA) and non-growing

665 (20 DPA) cotton fiber cell. Mean  $\pm$  SE (n = 5 to 8). Data labelled with different

666 low-case letters is significant at  $P < 0.05$ . *ns* = not significant. (D) oscillations in net

667  $\text{Ca}^{2+}$  measured from the tip and basal regions of growing cotton fiber (10 DPA). (E)

668 dynamics of net  $\text{H}^+$  fluxes measured from the tip region of the cotton fiber cells as a

669 function of its age. The ultradian  $\text{H}^+$  oscillations were observed from growing (5 and

670 10 DPA) but not in non-growing (20 DPA) cells. One (of 6) typical example is shown

671 for each treatment. The sign convention for all MIFE data is “influx positive”.

672

673 **Figure 5.** Transient responses of net  $\text{Ca}^{2+}$  (A and D),  $\text{H}^+$  (B and E) and  $\text{K}^+$  (C and F)

674 fluxes to 5 mM  $\text{H}_2\text{O}_2$  treatment measured from growing (10 DPA) and non-growing

675 (20 DPA) fiber cells in tip and base regions. Error bars indicate SE (n = 5 to 8). The

676 sign convention is “influx positive”.

677

678 **Figure 6.** Effects of  $\text{Ca}^{2+}$  channel blockers on *in vitro* cotton fiber growth.

679 Cotton seeds at 0 or 6 DPA were cultured in the BT medium contains either 50  $\mu\text{M}$

680 Ruthenium Red (RR), or 200  $\mu\text{M}$  Verapamil (VP), or 1 mM Gadolinium ( $\text{Gd}^{3+}$ ) for 6

681 d. Data labelled with different low-case letters is significant at  $P < 0.05$  (One-way

682 ANOVA, Duncan’s test). Error bars indicate SE (n=10-20).

683

684 **Figure 7.** A schematic model on diffusive growth of cotton fiber cells characterized

---

685 by  $\text{Ca}^{2+}$  patterning and ion fluxes.  
686 Cytosolic  $\text{Ca}^{2+}$  was found to be evenly distributed from tip to basal regions with  $\text{Ca}^{2+}$   
687 and  $\text{H}^+$  oscillations detected in both areas in the elongating fiber cells, which also  
688 responded to  $\text{H}_2\text{O}_2$  treatment by a massive increase in the net  $\text{Ca}^{2+}$  and  $\text{H}^+$  efflux in  
689 both tip and basal regions. By contrast, non-growing cells (20 DPA) did not respond  
690 to  $\text{H}_2\text{O}_2$  treatment and lacked  $\text{Ca}^{2+}$  and  $\text{H}^+$  oscillations (see text for more details).  
691 The findings indicate that the desensitization of the fiber cell and a loss of its ability to  
692 respond to  $\text{H}_2\text{O}_2$  may be causally related to the termination of the cotton fiber  
693 elongation. Basal location of sugar and  $\text{k}^+$  transporters was based on Ruan et al  
694 (2001).

#### 695 **Supplemental Data**

696 **Supplemental Figure S1.** The effect of  $\text{Ca}^{2+}$  blockers on cotton ovule growth.

697

698

699

700

701

702

703

704

705

706

707

708

709

710

711

712

713

714

715

716

717

718

719

720

721

722

723

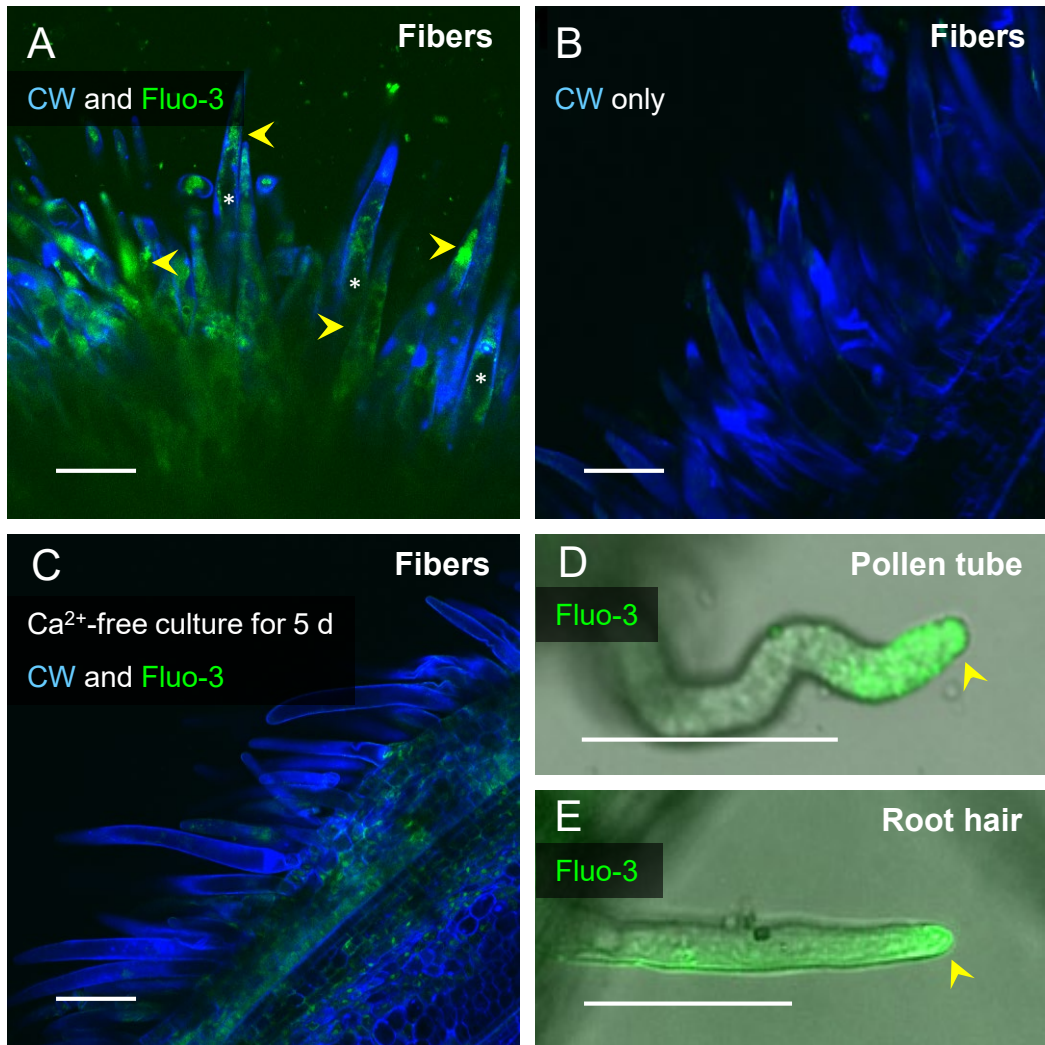

**Figure 1.** Validation of  $\text{Ca}^{2+}$  indicator Fluo-3 in cotton fibers, pollen tubes and root hairs.

Green fluorescence came from the membrane-impermeable intracellular  $\text{Ca}^{2+}$  indicator Fluo-3, whereas blue fluorescence reflected the cell wall indicator Calcofluor White (CW) binding to cellulose. Cotton seeds (5 days post anthesis, DPA) with fibers attached were co-stained with Fluo-3 and CW (A), or with CW only (B). (C) Cotton fibers derived from seeds cultured in a  $\text{Ca}^{2+}$ -free BT medium were co-stained with Fluo-3 and CW at 5 DPA. Note, the presence of  $\text{Ca}^{2+}$  fluorescence signals (arrowheads) in (A) outside the vacuoles (asterisks) but its absence in the negative controls of (B) and (C). (D and E) Representative images of cotton pollen tube and cotton root hair, respectively, stained with Fluo-3, showing  $\text{Ca}^{2+}$  fluorescence at the tip regions. Scale bars in (A, B and C) = 100  $\mu\text{m}$ , in (D and E) = 50  $\mu\text{m}$ .



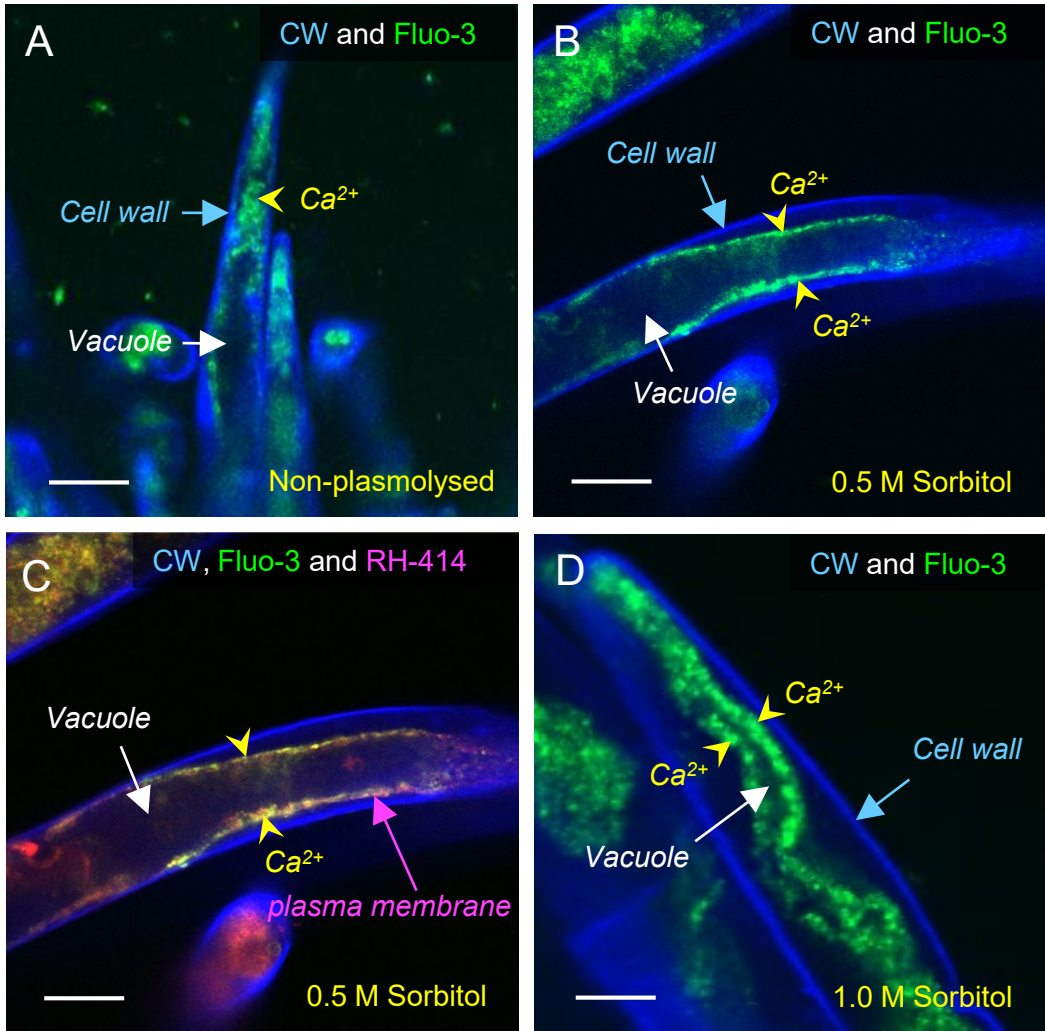

**Figure 2.** Localization of  $\text{Ca}^{2+}$  in the cytosol of elongating fiber cells.  $\text{Ca}^{2+}$  was indicated by green fluorescence emitted from Fluo-3.

Cell wall and plasma membrane were labelled with Calcofluor White (CW, blue fluorescence) and with RH-414 (red fluorescence), respectively. 5 d cotton seeds with fibers attached were incubated for 30 min in PBS medium (A), or the PBS with sorbitol at 0.5 M (B and C) or 1 M (D) before confocal imaging. Note, in comparison with the control (Non-plasmolysed in (A), plasmolysis resulted in protoplast being pulled away from the cell wall (B, C), a phenomenon becoming more evident under 1.0 M sorbitol treatment (D). In all cases,  $\text{Ca}^{2+}$  was localized in the cytosol between the cell wall and vacuole. Scale bars = 15  $\mu\text{m}$ .

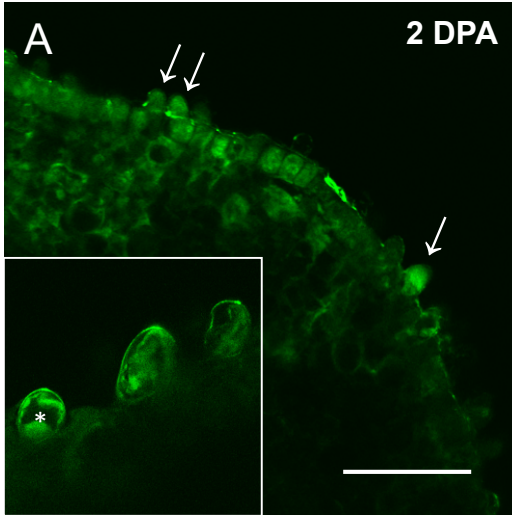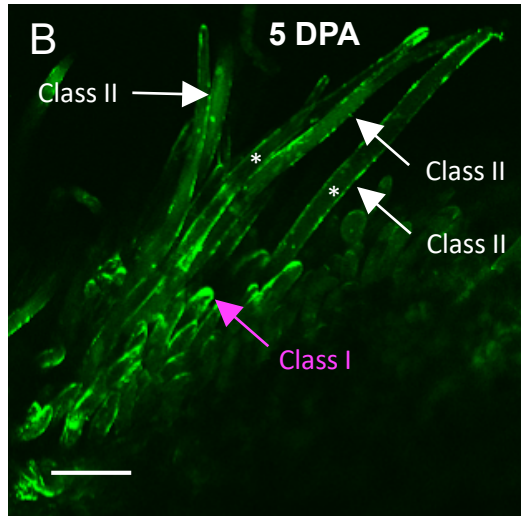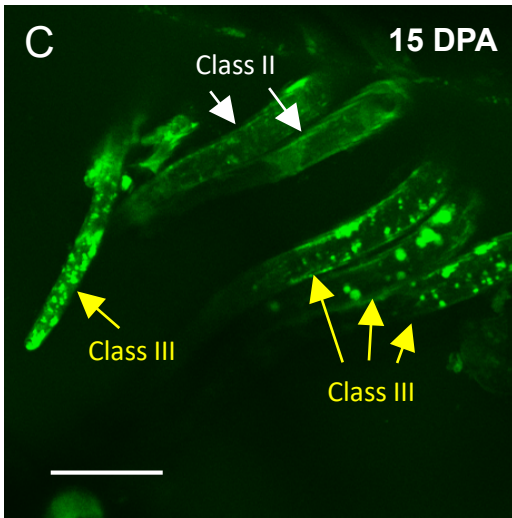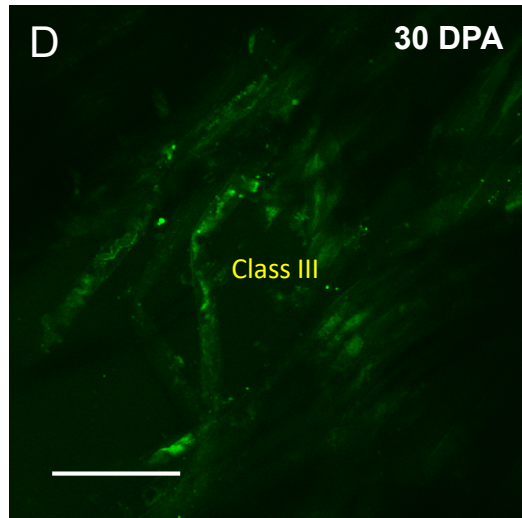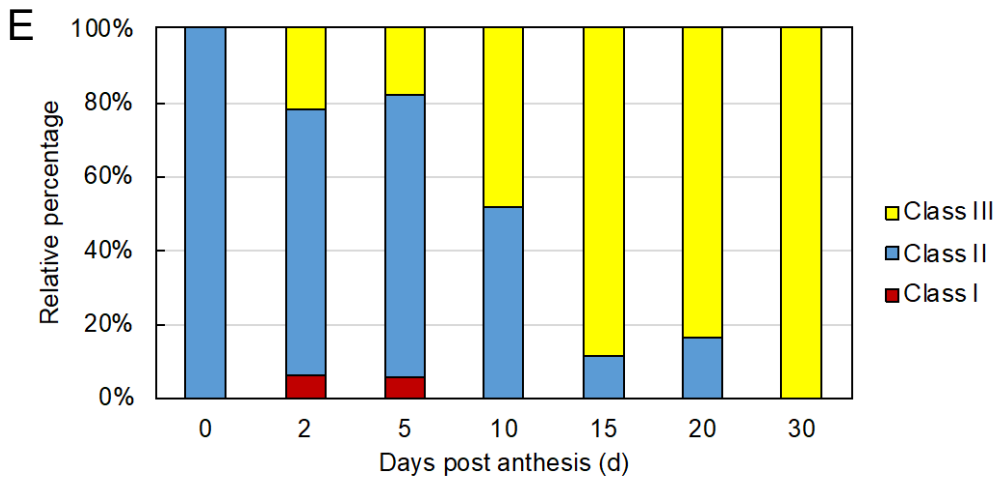

**Figure 3.** Dynamics of  $\text{Ca}^{2+}$  patterning in cotton fibers from elongation to rapid cell wall cellulose synthesis.  $\text{Ca}^{2+}$  was indicated by green fluorescence emitted from Fluo-3 labelling. (A) Young fiber cells elongated from seed epidermis (arrows) at 2 DPA, showing  $\text{Ca}^{2+}$  signals in the cytosol (insert). (B) Elongating fiber cells at 5 DPA, exhibiting  $\text{Ca}^{2+}$  signals occasionally concentrated to the tip area but mostly in the peripheral regions of the fibers, termed as pattern class I and II, respectively. Asterisks in (A and B) indicate vacuoles. (C) Cotton fibers at 15 DPA, a transition phase from elongation to secondary cell wall cellulose synthesis. The fluorescent  $\text{Ca}^{2+}$  signals became aggregated or patchy, categorized as pattern class III. (D) Cotton fibers at 30 DPA, undergoing intensive cellulose synthesis, displayed much reduced  $\text{Ca}^{2+}$  signals, in comparison with that in the early stages (A, B, and C). Scale bars = 100  $\mu\text{m}$ . I The relative percentages of classes I, II and III  $\text{Ca}^{2+}$  patterns across fiber development, which were calculated by counting at least 30 individual fiber cells randomly selected from 10 seeds at each stage.

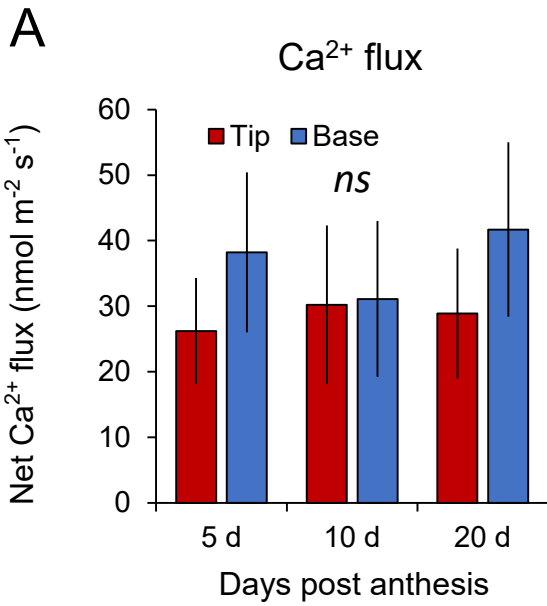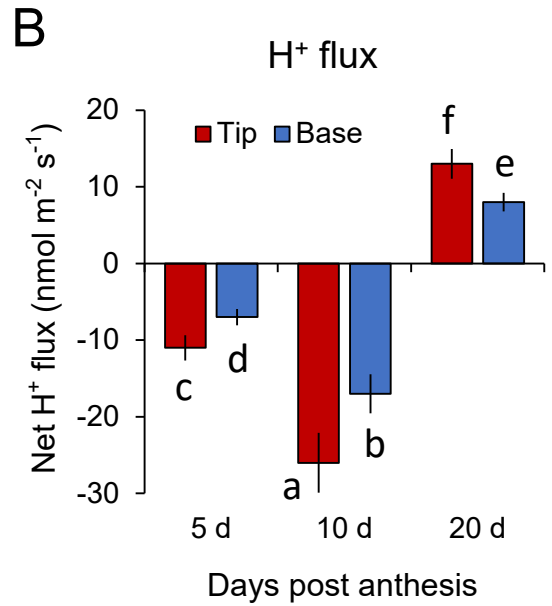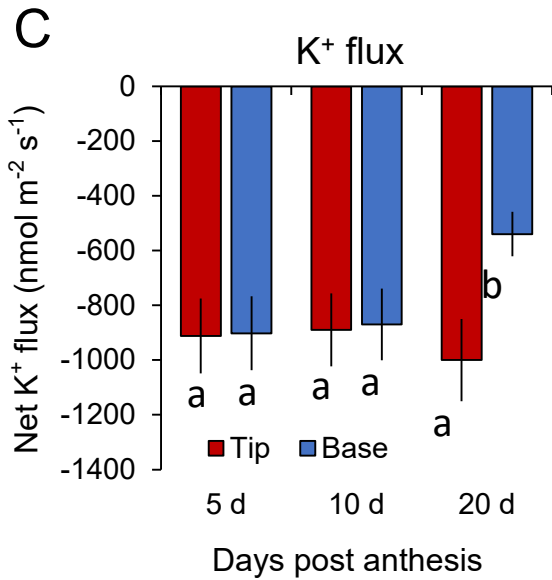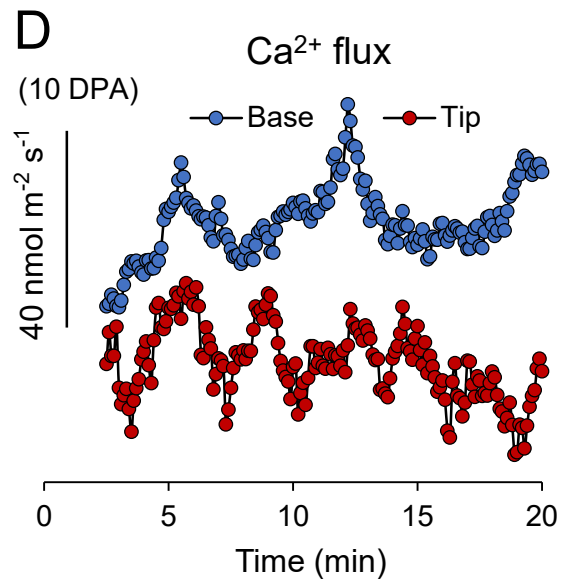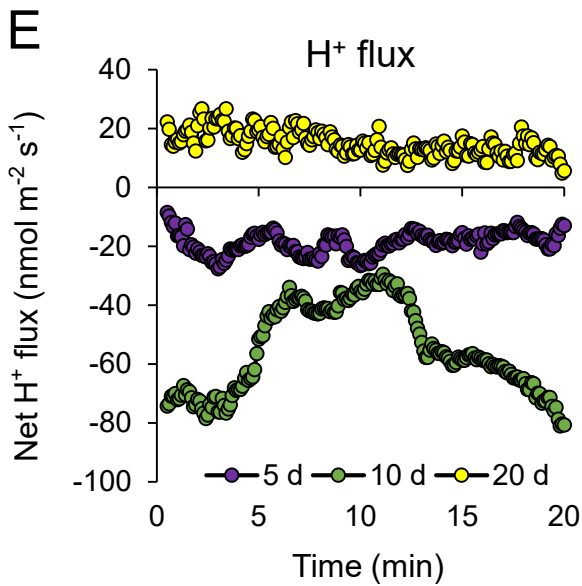

**Figure 4.** Net ion flux profiles across the plasma membrane of the cotton fiber cells measured by the non-invasive microelectrode MIFE technique.

Panel A to C show mean values of steady-state net  $\text{Ca}^{2+}$  (A),  $\text{H}^+$  (B), and  $\text{K}^+$  (C) fluxes measured from the tip and basal regions of growing (5 and 10 DPA) and non-growing (20 DPA) cotton fiber cell. Mean  $\pm$  SE ( $n = 5$  to 8). Data labelled with different low-case letters is significant at  $P < 0.05$ . *ns* = not significant. (D) oscillations in net  $\text{Ca}^{2+}$  measured from the tip and basal regions of growing cotton fiber (10 DPA). (E) dynamics of net  $\text{H}^+$  fluxes measured from the tip region of the cotton fiber cells as a function of its age. The ultradian  $\text{H}^+$  oscillations were observed from growing (5 and 10 DPA) but not in non-growing (20 DPA) cells. One (of 6) typical example is shown for each treatment. The sign convention for all MIFE data is “influx positive”.

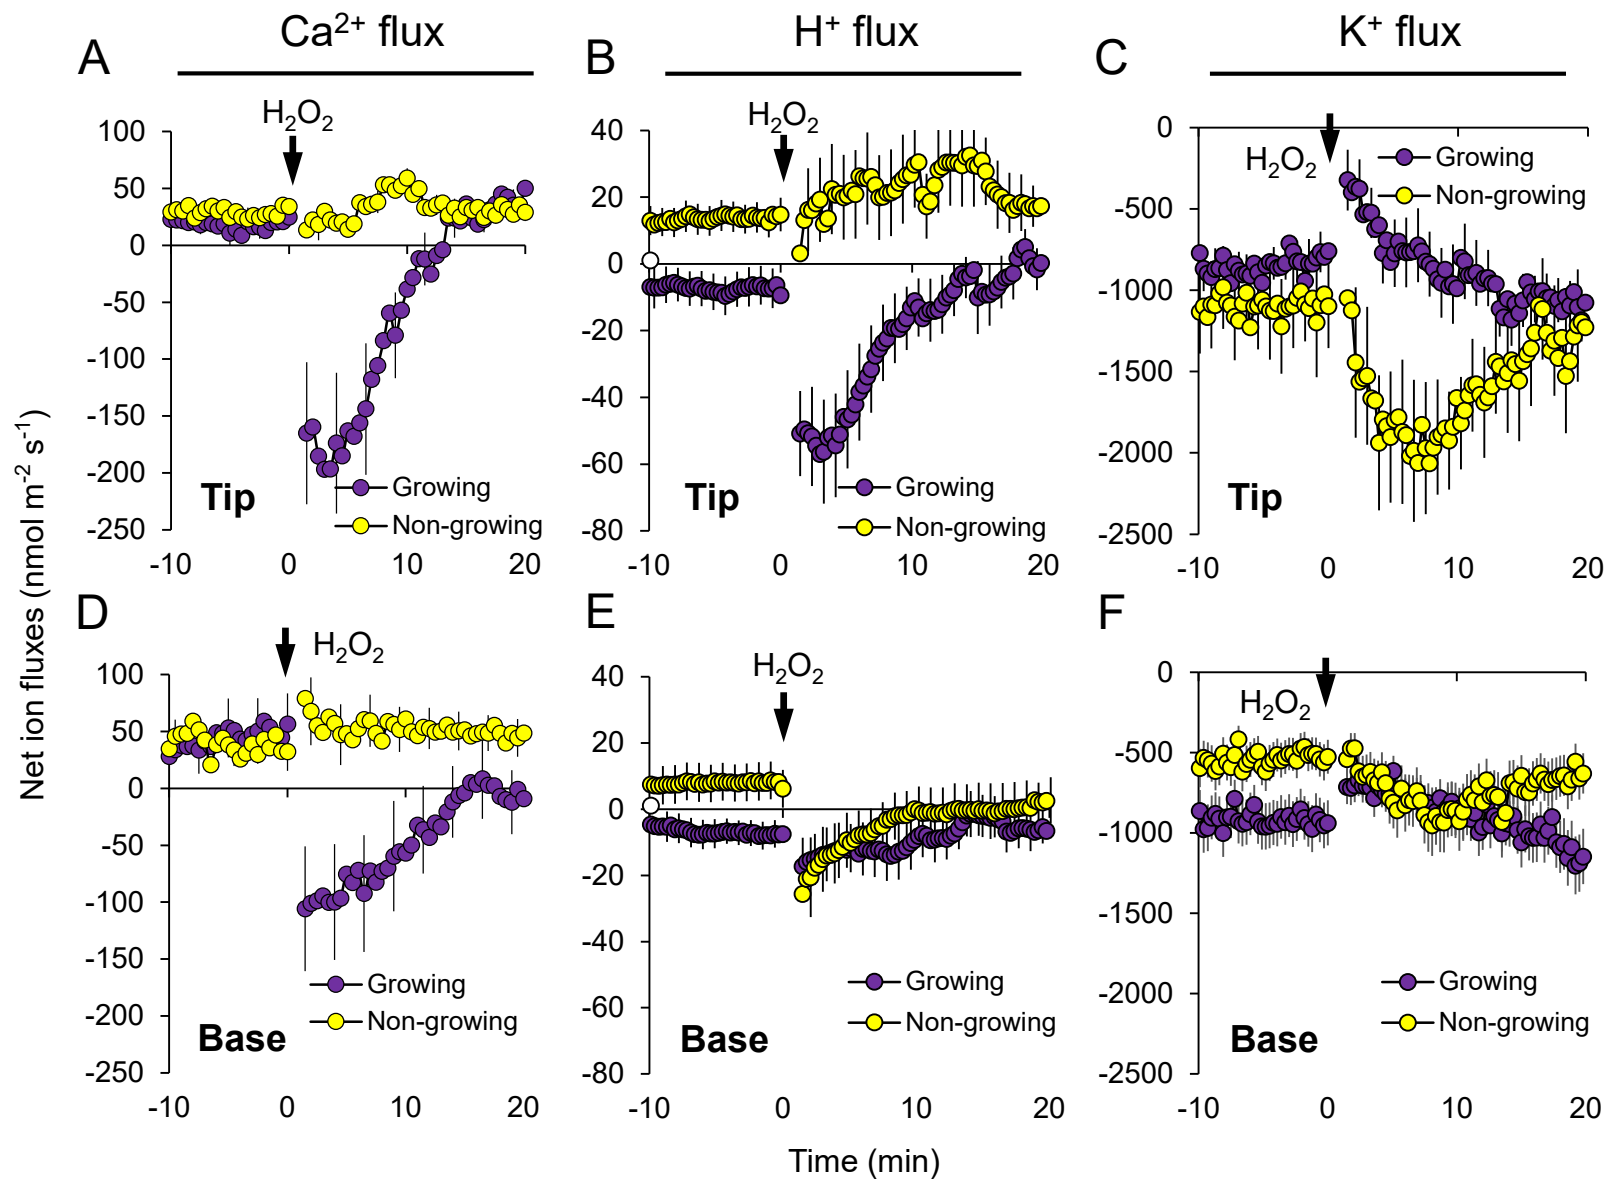

**Figure 5.** Transient responses of net Ca<sup>2+</sup> (A and D), H<sup>+</sup> (B and E) and K<sup>+</sup> (C and F) fluxes to 5 mM H<sub>2</sub>O<sub>2</sub> treatment measured from growing (10 DPA) and non-growing (20 DPA) fiber cells in tip and base regions. Error bars indicate SE (n = 5 to 8). The sign convention is “influx positive”.

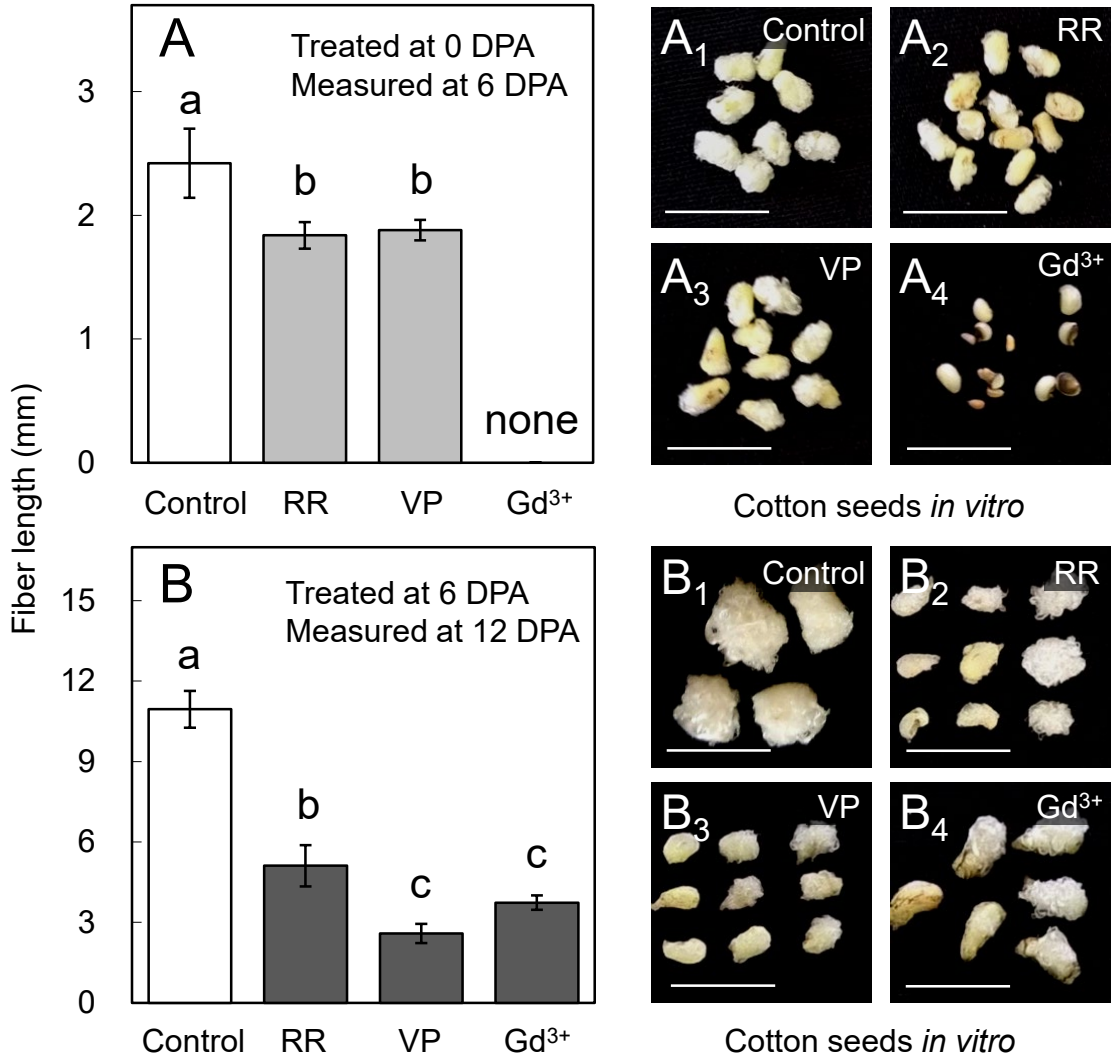

**Figure 6.** Effects of Ca<sup>2+</sup> channel blockers on *in vitro* cotton fiber growth.

Cotton seeds at 0 or 6 DPA were cultured in the BT medium contains either 50  $\mu$ M Ruthenium Red (RR), 200  $\mu$ M Verapamil (VP), or 1 mM Gadolinium (Gd<sup>3+</sup>) for 6 d. Data labelled with different low-case letters is significant at  $P < 0.05$  (One-way ANOVA, Duncan's test). Error bars indicate SE (n=10-20).

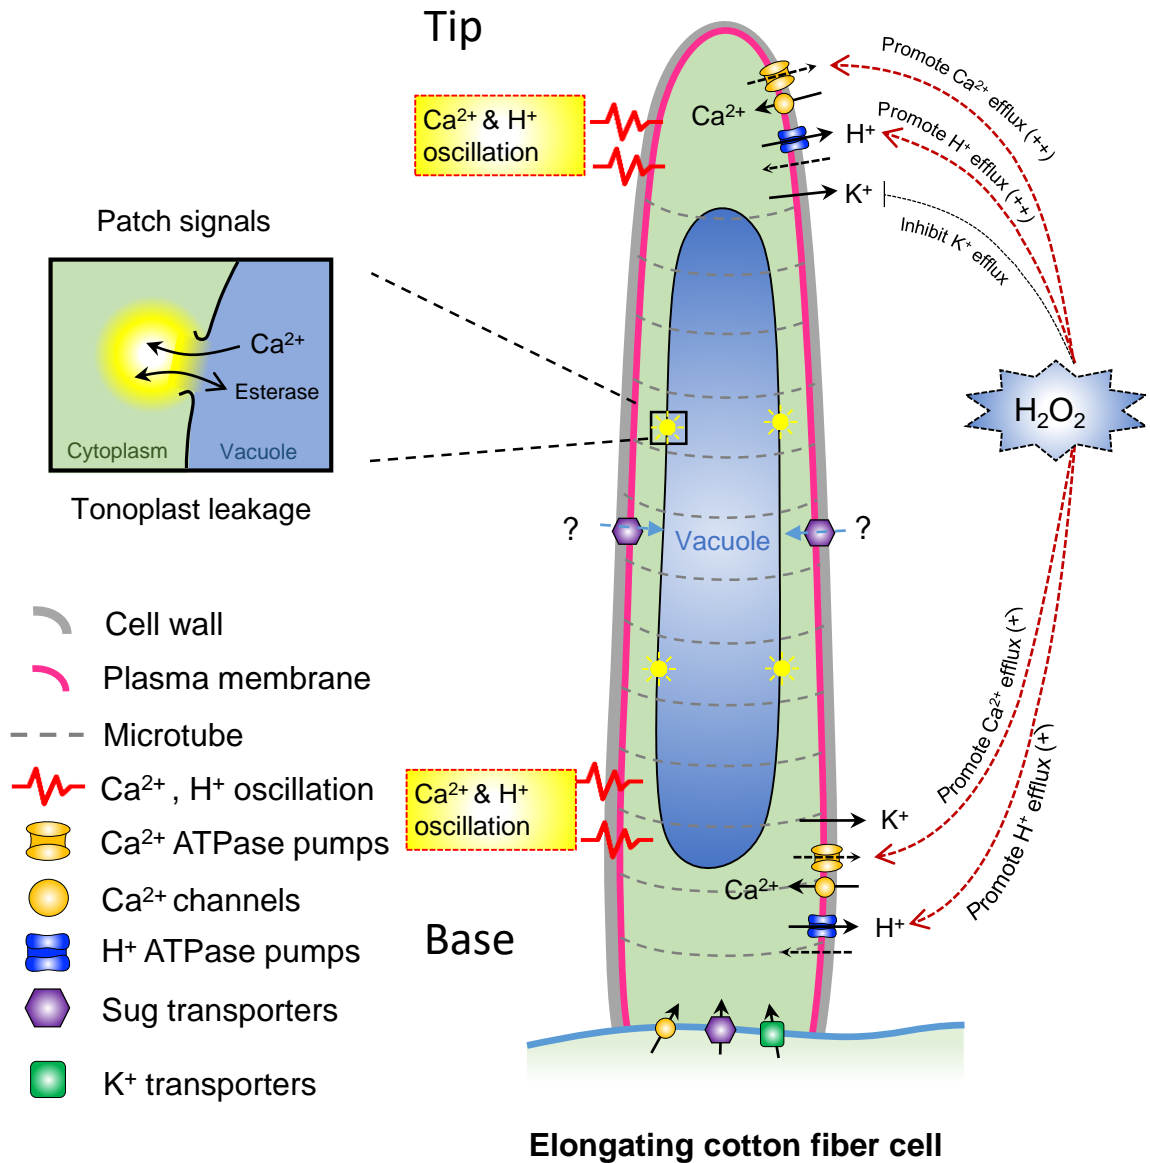

**Figure 7.** A schematic model on diffusive growth of cotton fiber cells characterized by  $\text{Ca}^{2+}$  patterning and ion fluxes. Cytosolic  $\text{Ca}^{2+}$  was found to be evenly distributed from tip to basal regions with  $\text{Ca}^{2+}$  and  $\text{H}^+$  oscillations detected in both areas in the elongating fiber cells, which also respond to  $\text{H}_2\text{O}_2$  treatment by a massive increase in the net  $\text{Ca}^{2+}$  and  $\text{H}^+$  efflux in both tip and basal regions. By contrast, non-growing cells (20 DPA) did not respond to  $\text{H}_2\text{O}_2$  treatment and lacked  $\text{Ca}^{2+}$  and  $\text{H}^+$  oscillations (see text for more details). The findings suggest that the desensitization of the fiber cell and a loss of its ability to respond to  $\text{H}_2\text{O}_2$  may be causally related to the termination of the cotton fiber elongation. Basal location of sugar and  $\text{k}^+$  transporters was based on Ruan et al (2001).



## Parsed Citations

- Amor Y, Haigler CH, Johnson S, Wainscott M, Delmer DP (1995) A membrane-associated form of sucrose synthase and its potential role in synthesis of cellulose and callose in plants. *Proc Natl Acad Sci U S A* 92: 9353–9357  
Google Scholar: [Author Only](#) [Title Only](#) [Author and Title](#)
- Beasley CA, Ting IP (1974) Effects of plant growth substances on in vitro fiber development from unfertilized cotton ovules. *Am J Bot* 61: 188–194  
Google Scholar: [Author Only](#) [Title Only](#) [Author and Title](#)
- Bose J, Pottosin II, Shabala SS, Palmgren MG, Shabala S (2011) Calcium efflux systems in stress signaling and adaptation in plants. *Front Plant Sci* 2: 1–17  
Google Scholar: [Author Only](#) [Title Only](#) [Author and Title](#)
- Chen T, Wu X, Chen Y, Li X, Huang M, Zheng M, Baluška F, Šamaj J, Lin J (2009) Combined proteomic and cytological analysis of Ca<sup>2+</sup>-calmodulin regulation in *Picea meyeri* pollen tube growth. *Plant Physiol* 149: 1111–1126  
Google Scholar: [Author Only](#) [Title Only](#) [Author and Title](#)
- Damineli DSC, Portes MT, Feijó JA (2017) Oscillatory signatures underlie growth regimes in *Arabidopsis* pollen tubes: Computational methods to estimate tip location, periodicity, and synchronization in growing cells. *J Exp Bot* 68: 3267–3281  
Google Scholar: [Author Only](#) [Title Only](#) [Author and Title](#)
- Demidchik V, Shabala S, Isayenkov S, Cuin TA, Pottosin I (2018) Calcium transport across plant membranes: mechanisms and functions. *New Phytol* 220: 49–69  
Google Scholar: [Author Only](#) [Title Only](#) [Author and Title](#)
- Demidchik V, Maathuis FJM (2007) Physiological roles of nonselective cation channels in plants: from salt stress to signalling and development. *New Phytol* 175: 387–404  
Google Scholar: [Author Only](#) [Title Only](#) [Author and Title](#)
- De Vriese K, Costa A, Beeckman T, Vanneste S (2018) Pharmacological strategies for manipulating plant Ca<sup>2+</sup> signalling. *Int J Mol Sci* 19 (5). doi:10.3390/ijms19051506  
Google Scholar: [Author Only](#) [Title Only](#) [Author and Title](#)
- Dhindsa RS, Beasley CA, Ting IP (1975) Osmoregulation in cotton fiber. *Plant Physiol* 56: 394–398  
Google Scholar: [Author Only](#) [Title Only](#) [Author and Title](#)
- Fan JL, Wei XZ, Wan LC, Zhang LY, Zhao XQ, Liu WZ, Hao HQ, Zhang HY (2011) Disarrangement of actin filaments and Ca<sup>2+</sup> gradient by CdCl<sub>2</sub> alters cell wall construction in *Arabidopsis thaliana* root hairs by inhibiting vesicular trafficking. *J Plant Physiol* 168: 1157–1167  
Google Scholar: [Author Only](#) [Title Only](#) [Author and Title](#)
- Foreman J, Demidchik V, Bothwell JHF, Mylona P, Miedema H, Angel Torres M, Linstead P, Costa S, Brownlee C, Jones JDG, et al (2003) Reactive oxygen species produced by NADPH oxidase regulate plant cell growth. *Nature* 422: 442–446  
Google Scholar: [Author Only](#) [Title Only](#) [Author and Title](#)
- García Bossi J, Kumar K, Barberini ML, Domínguez GD, Rondón Guerrero YDC, Marino-Buslje C, Obertello M, Musciatti JP, Estevez JM (2020) The role of P-type IIA and P-type IIB Ca<sup>2+</sup>-ATPases in plant development and growth. *J Exp Bot* 71: 1239–1248  
Google Scholar: [Author Only](#) [Title Only](#) [Author and Title](#)
- Geitmann A, Ortega JKE (2009) Mechanics and modeling of plant cell growth. *Trends Plant Sci* 14: 467–478  
Google Scholar: [Author Only](#) [Title Only](#) [Author and Title](#)
- Gilroy S, Bialasek M, Suzuki N, Górecka M, Devireddy AR, Karpiński S, Mittler R (2016) ROS, calcium, and electric signals: Key mediators of rapid systemic signaling in plants. *Plant Physiol* 171: 1606–1615  
Google Scholar: [Author Only](#) [Title Only](#) [Author and Title](#)
- Gradmann D (2001) Models for oscillations in plants. *Funct Plant Biol* 28: 577–590  
Google Scholar: [Author Only](#) [Title Only](#) [Author and Title](#)
- Gu Z, Meng D, Yang Q, Yuan H, Wang A, Li W, Chen Q, Zhang Y, Wang D, Li T (2015) A CBL gene, MdCBL5, controls the calcium signal and influences pollen tube growth in apple. *Tree Genet Genomes* 11: 27  
Google Scholar: [Author Only](#) [Title Only](#) [Author and Title](#)
- Hansen UP (1978) Do light-induced changes in the membrane potential of *Nitella* reflect the feed-back regulation of a cytoplasmic parameter? *J Membr Biol* 41: 197–224
- Hepler PK, Rounds CM, Winship LJ (2013) Control of cell wall extensibility during pollen tube growth. *Mol Plant* 6: 998–1017  
Google Scholar: [Author Only](#) [Title Only](#) [Author and Title](#)
- Hoffmann RD, Portes MT, Olsen LI, Damineli DSC, Hayashi M, Nunes CO, Pedersen JT, Lima PT, Campos C, Feijó JA, et al (2020) Plasma membrane H<sup>+</sup>-ATPases sustain pollen tube growth and fertilization. *Nat Commun* 11: 2395  
Google Scholar: [Author Only](#) [Title Only](#) [Author and Title](#)

**Holdaway-Clarke T, Hackett G, Kunkel JG, Hepler P, Feijo J (1998) Oscillations of cell expansion rate, cytoplasmic calcium, and calcium influx in the pollen tube. J Gen Physiol 112: 33–53**

Google Scholar: [Author Only Title Only Author and Title](#)

**Hu Y, Chen J, Fang L, Zhang Z, Ma W, Niu Y, Ju L, Deng J, Zhao T, Lian J, et al (2019) Gossypium barbadense and Gossypium hirsutum genomes provide insights into the origin and evolution of allotetraploid cotton. Nat Genet 51: 739–748**

Google Scholar: [Author Only Title Only Author and Title](#)

**Huang QS, Wang HY, Gao P, Wang GY, Xia GX (2008) Cloning and characterization of a calcium dependent protein kinase gene associated with cotton fiber development. Plant Cell Rep 27: 1869–1875**

Google Scholar: [Author Only Title Only Author and Title](#)

**De Jong TG, Sterk AE, Guo F (2019) Numerical method to compute hypha tip growth for data driven validation. IEEE Access 7: 53766–53776**

Google Scholar: [Author Only Title Only Author and Title](#)

**Kim HJ, Triplett BA (2001) Cotton fiber growth in planta and in vitro. Models for plant cell elongation and cell wall biogenesis. Plant Physiol 127: 1361–1366**

Google Scholar: [Author Only Title Only Author and Title](#)

**Lee YJ, Yang Z (2008) Tip growth: signaling in the apical dome. Curr Opin Plant Biol 11: 662–671**

Google Scholar: [Author Only Title Only Author and Title](#)

**Li H Bin, Qin YM, Pang Y, Song WQ, Mei WQ, Zhu YX (2007) A cotton ascorbate peroxidase is involved in hydrogen peroxide homeostasis during fibre cell development. New Phytol 175: 462–471**

Google Scholar: [Author Only Title Only Author and Title](#)

**Li XR, Wang L, Ruan YL (2010) Developmental and molecular physiological evidence for the role of phosphoenolpyruvate carboxylase in rapid cotton fibre elongation. J Exp Bot 61: 287–295**

Google Scholar: [Author Only Title Only Author and Title](#)

**MacHado A, Wu Y, Yang Y, Llewellyn DJ, Dennis ES (2009) The MYB transcription factor GhMYB25 regulates early fibre and trichome development. Plant J 59: 52–62**

Google Scholar: [Author Only Title Only Author and Title](#)

**Mangano S, Martínez Pacheco J, Marino-Buslje C, Estevez JM (2018) How does pH fit in with oscillating polar growth? Trends Plant Sci 23: 479–489**

**Monshausen GB, Messerli MA, Gilroy S (2008) Imaging of the Yellow Cameleon 3.6 indicator reveals that elevations in cytosolic Ca<sup>2+</sup> follow oscillating increases in growth in root hairs of Arabidopsis. Plant Physiol 147: 1690–1698**

Google Scholar: [Author Only Title Only Author and Title](#)

**Nakamura M, Grebe M (2018) Outer, inner and planar polarity in the Arabidopsis root. Curr Opin Plant Biol 41: 46–53**

Google Scholar: [Author Only Title Only Author and Title](#)

**Pottosin, II, Dobrovinskaya OR, Muniz J (1999) Cooperative block of the plant endomembrane ion channel by ruthenium red. Biophys J 77 (4):1973-1979.**

Google Scholar: [Author Only Title Only Author and Title](#)

**Qin YM, Zhu YX (2011) How cotton fibers elongate: A tale of linear cell-growth mode. Curr Opin Plant Biol 14: 106–111**

Google Scholar: [Author Only Title Only Author and Title](#)

**Qu H, Jiang X, Shi Z, Liu L, Zhang S (2012) Fast loading ester fluorescent Ca<sup>2+</sup> and pH indicators into pollen of Pyrus pyrifolia. J Plant Res 125: 185–195**

Google Scholar: [Author Only Title Only Author and Title](#)

**Rounds CM, Bezanilla M (2013) Growth mechanisms in tip-growing plant cells. Annu Rev Plant Biol 64: 243–265**

Google Scholar: [Author Only Title Only Author and Title](#)

**Ruan Y-L (2005) Recent advances in understanding cotton fibre and seed development. Seed Sci Res 15: 269–280**

Google Scholar: [Author Only Title Only Author and Title](#)

**Ruan YL (2007) Goldacre paper: Rapid cell expansion and cellulose synthesis regulated by plasmodesmata and sugar: Insights from the single-celled cotton fibre. Funct Plant Biol 34: 1–10**

Google Scholar: [Author Only Title Only Author and Title](#)

**Ruan YL, Chourey PS, Delmer DP, Perez-Grau L (1997) The differential expression of sucrose synthase in relation to diverse patterns of carbon partitioning in developing cotton seed. Plant Physiol 115: 375–385**

Google Scholar: [Author Only Title Only Author and Title](#)

**Ruan YL, Llewellyn DJ, Furbank RT (2000) Pathway and control of sucrose import into initiating cotton fibre cells. Aust J Plant Physiol 27: 795–800**

Google Scholar: [Author Only Title Only Author and Title](#)

Ruan YL, Llewellyn DJ, Furbank RT (2001) The control of single-celled cotton fiber elongation by developmentally reversible gating of plasmodesmata and coordinated expression of sucrose and K<sup>+</sup> transporters and expansin. *Plant Cell* 13: 47–60

Google Scholar: [Author Only](#) [Title Only](#) [Author and Title](#)

Ruan YL, Llewellyn DJ, Furbank RT (2003) Suppression of sucrose synthase gene expression represses cotton fiber cell initiation, elongation, and seed development. *Plant Cell* 15: 952–964

Google Scholar: [Author Only](#) [Title Only](#) [Author and Title](#)

Ruan YL, Xu SM, White R, Furbank RT (2004) Genotypic and developmental evidence for the role of plasmodesmatal regulation in cotton fiber elongation mediated by callose turnover. *Plant Physiol* 136: 4104–4113

Google Scholar: [Author Only](#) [Title Only](#) [Author and Title](#)

Rubio F, Nieves-Cordones M, Horie T, Shabala S (2020) Doing 'business as usual' comes with a cost: evaluating energy cost of maintaining plant intracellular K<sup>+</sup> homeostasis under saline conditions. *New Phytol* 225: 1097–1104

Google Scholar: [Author Only](#) [Title Only](#) [Author and Title](#)

Schiøtt M, Romanowsky SM, Bækgaard L, Jakobsen MK, Palmgren MG, Harper JF (2004) A plant plasma membrane Ca<sup>2+</sup> pump is required for normal pollen tube growth and fertilization. *Proc Natl Acad Sci U S A* 101: 9502–9507

Google Scholar: [Author Only](#) [Title Only](#) [Author and Title](#)

Seagull RW (1990) The effects of microtubule and microfilament disrupting agents on cytoskeletal arrays and wall deposition in developing cotton fibers. *Protoplasma* 159: 44–59

Google Scholar: [Author Only](#) [Title Only](#) [Author and Title](#)

Seagull RW (1992) A quantitative electron microscopic study of changes in microtubule arrays and wall microfibril orientation during in vitro cotton fiber development. *J Cell Sci* 101: 561–577

Google Scholar: [Author Only](#) [Title Only](#) [Author and Title](#)

Shabala S, Knowles A (2002) Rhythmic patterns of nutrient acquisition by wheat roots. *Funct Plant Biol* 29: 595–605

Google Scholar: [Author Only](#) [Title Only](#) [Author and Title](#)

Shabala S, Shabala L, Bose J, Cui T, Newman I (2013) Ion flux measurements using the MIFE technique. *Methods Mol Biol* 953: 171–183

Google Scholar: [Author Only](#) [Title Only](#) [Author and Title](#)

Shabala S, Shabala L, Gradmann D, Chen Z, Newman I, Mancuso S (2006) Oscillations in plant membrane transport: Model predictions, experimental validation, and physiological implications. *J Exp Bot* 57: 171–184

Google Scholar: [Author Only](#) [Title Only](#) [Author and Title](#)

Shabala SN, Newman IA (1997) Proton and calcium flux oscillations in the elongation region correlate with root nutation. *Physiol Plant* 100: 917–926

Google Scholar: [Author Only](#) [Title Only](#) [Author and Title](#)

Shabala SN, Newman IA, Morris J (1997) Oscillations in H<sup>+</sup> and Ca<sup>2+</sup> ion fluxes around the elongation region of corn roots and effects of external pH. *Plant Physiol* 113: 111–118

Google Scholar: [Author Only](#) [Title Only](#) [Author and Title](#)

Shan CM, Shanguan XX, Zhao B, Zhang XF, Chao LM, Yang CQ, Wang LJ, Zhu HY, Zeng Y Da, Guo WZ, et al (2014) Control of cotton fibre elongation by a homeodomain transcription factor GhHOX3. *Nat Commun* 21: 5519

Google Scholar: [Author Only](#) [Title Only](#) [Author and Title](#)

Smith LG, Oppenheimer DG (2005) Spatial control of cell expansion by the plant cytoskeleton. *Annu Rev Cell Dev Biol* 21: 271–95

Google Scholar: [Author Only](#) [Title Only](#) [Author and Title](#)

Suwińska A, Wasąg P, Zakrzewski P, Lenartowska M, Lenartowski R (2017) Calreticulin is required for calcium homeostasis and proper pollen tube tip growth in *Petunia*. *Planta* 245: 909–926

Google Scholar: [Author Only](#) [Title Only](#) [Author and Title](#)

Tang W, Tu L, Yang X, Tan J, Deng F, Hao J, Guo K, Lindsey K, Zhang X (2014) The calcium sensor GhCaM7 promotes cotton fiber elongation by modulating reactive oxygen species (ROS) production. *New Phytol* 202: 509–520

Google Scholar: [Author Only](#) [Title Only](#) [Author and Title](#)

Tian J, Han L, Feng Z, Wang G, Liu W, Ma Y, Yu Y, Kong Z (2015) Orchestration of microtubules and the actin cytoskeleton in trichome cell shape determination by a plant-unique kinesin. *Elife* 4: e09351

Google Scholar: [Author Only](#) [Title Only](#) [Author and Title](#)

Tian W, Wang C, Gao Q, Li L, Luan S (2020) Calcium spikes, waves and oscillations in plant development and biotic interactions. *Nat Plants* 6: 1–10

Google Scholar: [Author Only](#) [Title Only](#) [Author and Title](#)

Tiwari SC, Wilkins TA (1995) Cotton (*Gossypium hirsutum*) seed trichomes expand via diffuse growing mechanism. *Can J Bot* 73: 746–757

Google Scholar: [Author Only](#) [Title Only](#) [Author and Title](#)

**Velarde-Buendía AM, Shabala S, Cvikrova M, Dobrovinskaya O, Pottosin I (2012) Salt-sensitive and salt-tolerant barley varieties differ in the extent of potentiation of the ROS-induced K<sup>+</sup> efflux by polyamines. Plant Physiol Biochem 61: 18–23**

Google Scholar: [Author Only](#) [Title Only](#) [Author and Title](#)

**Walford SA, Wu Y, Llewellyn DJ, Dennis ES (2011) GhMYB25-like: A key factor in early cotton fibre development. Plant J 65: 785–797**

Google Scholar: [Author Only](#) [Title Only](#) [Author and Title](#)

**Wang L, Kartika D, Ruan YL (2021) Looking into 'hair tonics' for cotton fiber initiation. New Phytol doi: 10.1111/nph.16898**

Google Scholar: [Author Only](#) [Title Only](#) [Author and Title](#)

**Wang L, Li XR, Lian H, Ni DA, He YK, Chen XY, Ruan YL (2010) Evidence that high activity of vacuolar invertase is required for cotton fiber and arabisopsis root elongation through osmotic dependent and independent pathways, respectively. Plant Physiol 154: 744–756**

Google Scholar: [Author Only](#) [Title Only](#) [Author and Title](#)

**White PJ (1996) Specificity of ion channel inhibitors for the maxi cation channel in rye root plasma membranes. J Exp Bot 47: 713–716**

Google Scholar: [Author Only](#) [Title Only](#) [Author and Title](#)

**Wu Q, Su N, Shabala L, Huang L, Yu M, Shabala S (2020) Understanding the mechanistic basis of ameliorating effects of hydrogen rich water on salinity tolerance in barley. Environ Exp Bot 117: 104136**

Google Scholar: [Author Only](#) [Title Only](#) [Author and Title](#)

**Yanagisawa M, Desyatova AS, Belteton SA, Mallery EL, Turner JA, Szymanski DB (2015) Patterning mechanisms of cytoskeletal and cell wall systems during leaf trichome morphogenesis. Nat Plants 1: 15014**

Google Scholar: [Author Only](#) [Title Only](#) [Author and Title](#)

**Yang Z (1998) Signaling tip growth in plants. Curr Opin Plant Biol 1: 525–530**

Google Scholar: [Author Only](#) [Title Only](#) [Author and Title](#)

**Yu Y, Wu S, Nowak J, Wang G, Han L, Feng Z, Mendrinna A, Ma Y, Wang H, Zhang X, et al (2019) Live-cell imaging of the cytoskeleton in elongating cotton fibres. Nat Plants 5: 498–504**

Google Scholar: [Author Only](#) [Title Only](#) [Author and Title](#)

**Zepeda-Jazo I, Velarde-Buendía AM, Enríquez-Figueroa R, Bose J, Shabala S, Muñiz-Murguía J, Pottosin I (2011) Polyamines interact with hydroxyl radicals in activating Ca<sup>2+</sup> and K<sup>+</sup> transport across the root epidermal plasma membranes. Plant Physiol 157: 2167–2180**

Google Scholar: [Author Only](#) [Title Only](#) [Author and Title](#)

**Zhang HM, Intiaz MS, Laver DR, McCurdy DW, Offler CE, Van Helden DF, Patrick JW (2015) Polarized and persistent Ca<sup>2+</sup> plumes define loci for formation of wall ingrowth papillae in transfer cells. J Exp Bot 66: 1179–1190**

Google Scholar: [Author Only](#) [Title Only](#) [Author and Title](#)

**Zhang M, Cao H-Z, Hou L, Song S-Q, Zeng J-Y, Pei Y (2017a) In vivo imaging of Ca<sup>2+</sup> accumulation during cotton fiber initiation using fluorescent indicator YC3.60. Plant Cell Rep 36: 911–918**

Google Scholar: [Author Only](#) [Title Only](#) [Author and Title](#)

**Zhang WH, Rengel Z, Kuo J (1998) Determination of intracellular Ca<sup>2+</sup> in cells of intact wheat roots: Loading of acetoxymethyl ester of Fluo-3 under low temperature. Plant J 15: 147–151**

Google Scholar: [Author Only](#) [Title Only](#) [Author and Title](#)

**Zhang Z, Ruan YL, Zhou N, Wang F, Guan X, Fang L, Shang X, Guo W, Zhu S, Zhang T (2017b) Suppressing a putative sterol carrier gene reduces plasmodesmal permeability and activates sucrose transporter genes during cotton fiber elongation. Plant Cell 29: 2027–2046**

Google Scholar: [Author Only](#) [Title Only](#) [Author and Title](#)

**Zhou L, Lan W, Jiang Y, Fang W, Luan S (2014) A calcium-dependent protein Kinase interacts with and activates a calcium channel to regulate pollen tube growth. Mol Plant 7: 369–376**

Google Scholar: [Author Only](#) [Title Only](#) [Author and Title](#)
